# Supplementary material for: Design, synthesis and biological evaluation of valepotriate derivatives as novel antitumor agents
Source: Royal Society of Chemistry journal article supplement (doi:10.1039/c6ra27478a), 2017-01-01

## Supplementary Material

### Design, synthesis and biological evaluation of valepotriates derivatives as novel antitumor agents†

Bo Zhang<sup>a,b+</sup>, Ruiying Guo<sup>c+</sup>, Yongzhou Hu<sup>c</sup>, Xiaowu Dong<sup>c</sup>, Nengming Lin<sup>b</sup>, Xiaoyang Dai<sup>a</sup>, Honghai Wu<sup>a</sup>, Shenglin Ma<sup>c\*</sup>,  
Bo Yang<sup>a\*</sup>

---

*a* Zhejiang Province Key Laboratory of Anti-Cancer Drug Research, Institute of Pharmacology and Toxicology, School of Pharmaceutical Sciences, Zhejiang University, Hangzhou, Zhejiang 310058, P.R. China. E-mail: yang924@zju.edu.cn, Tel.: +86-57188208400 (B.Y.)

*b* Translational Medicine Research Center, Nanjing Medical University, Affiliated Hangzhou Hospital, Hangzhou First People's Hospital, Hangzhou, Zhejiang 310006, P.R. China. E-mail: mashenglin@medmail.com.cn, Tel.: +86-57156007908 (M.S.L.)

*c* ZJU-ENS Joint Laboratory of Medicinal Chemistry, Zhejiang Province Key Laboratory of Anti-Cancer Drug Research, College of Pharmaceutical Sciences, Zhejiang University, Hangzhou, 310058, P.R. China.

+ These authors contributed equally to this work

†Electronic Supplementary Information (ESI) available: NMR Spectra of the synthesized compounds.

---

### Table of Contents

Spectra

S2

# Spectra

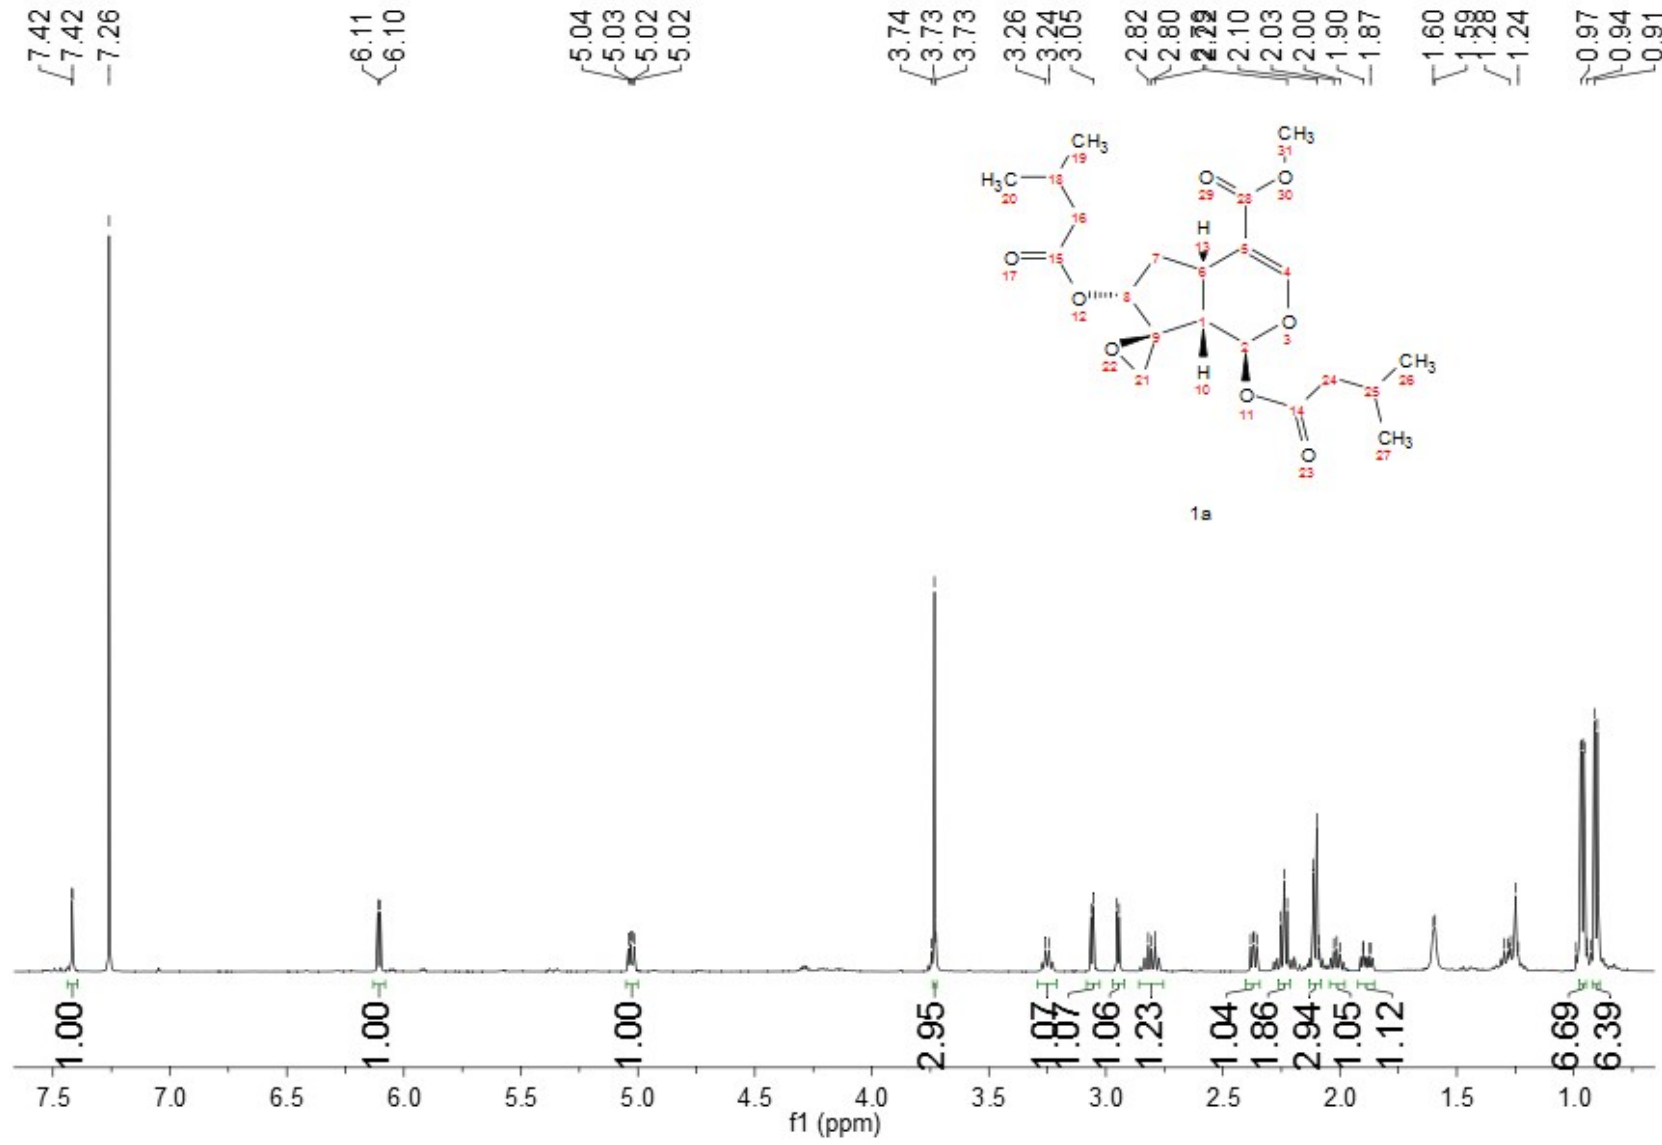

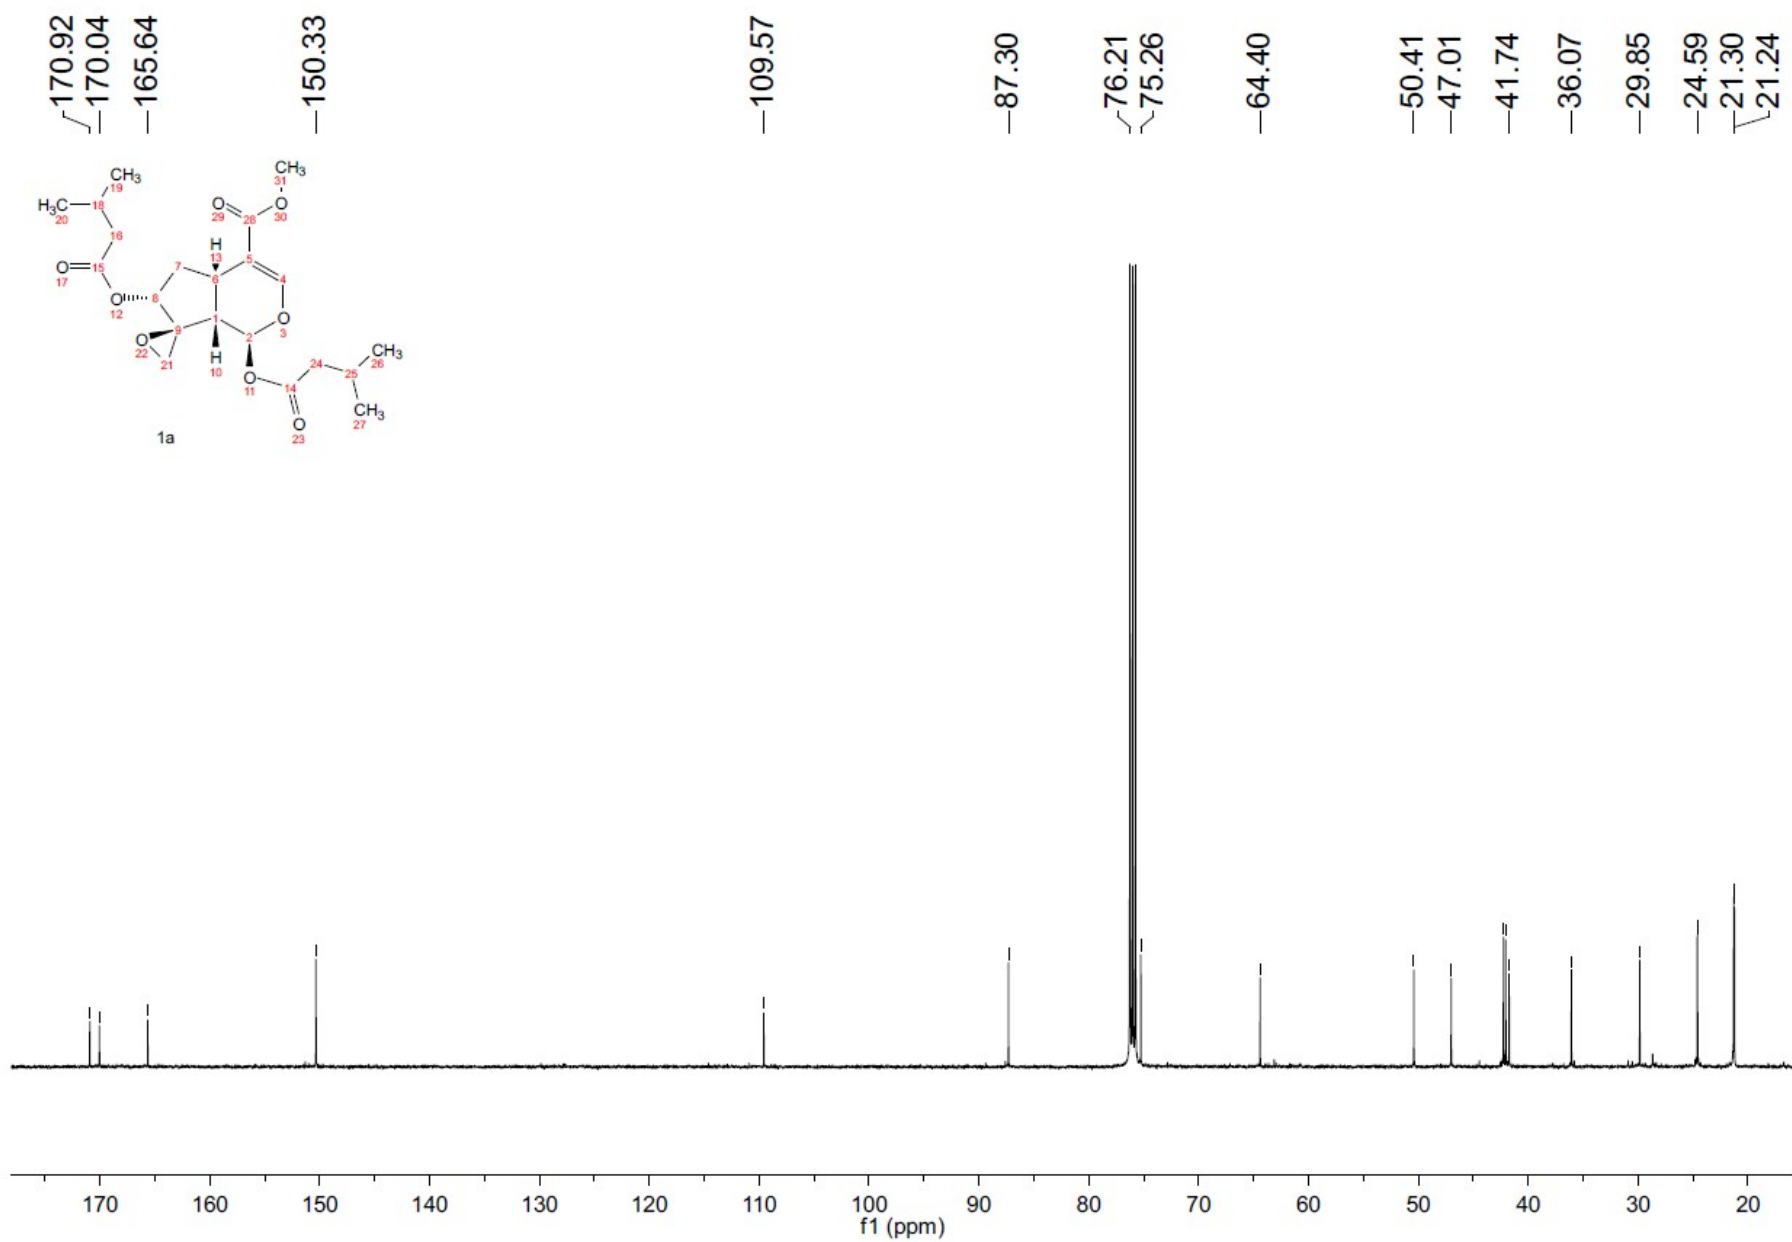

-7.41  
-7.26

6.13  
6.12

5.01  
5.00  
4.99  
4.99  
4.27  
4.26  
4.25  
4.25  
4.24  
4.19  
-3.74

3.25  
3.24  
2.97  
2.81  
2.59  
2.26  
2.10  
1.88  
1.84  
1.61

1.27  
1.22  
0.97

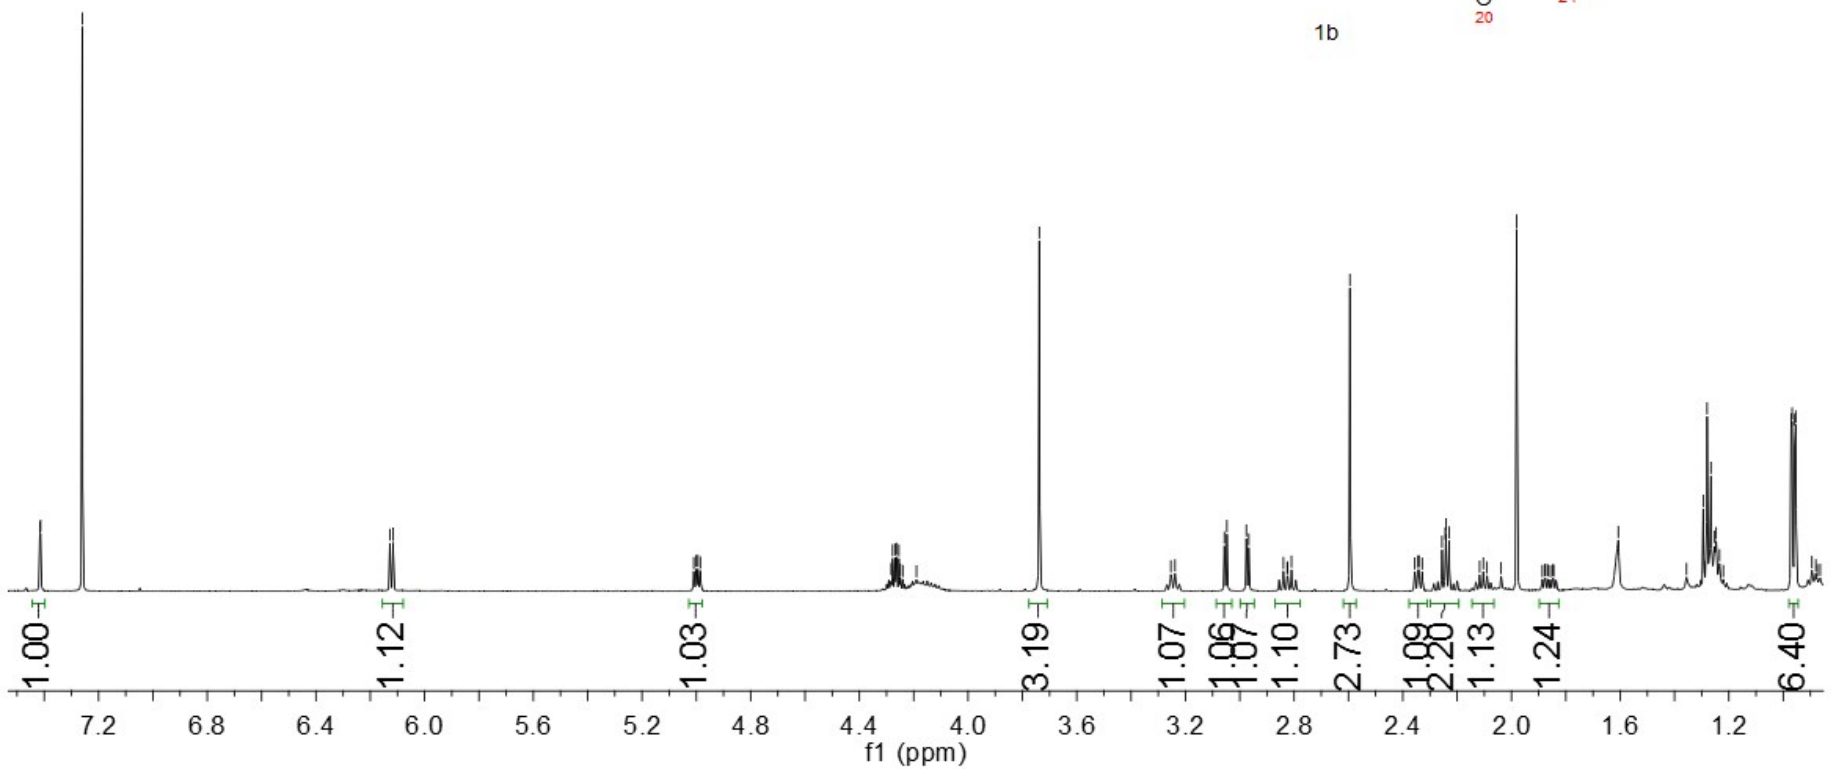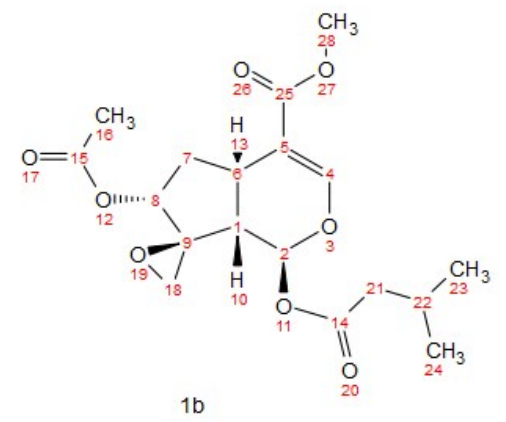

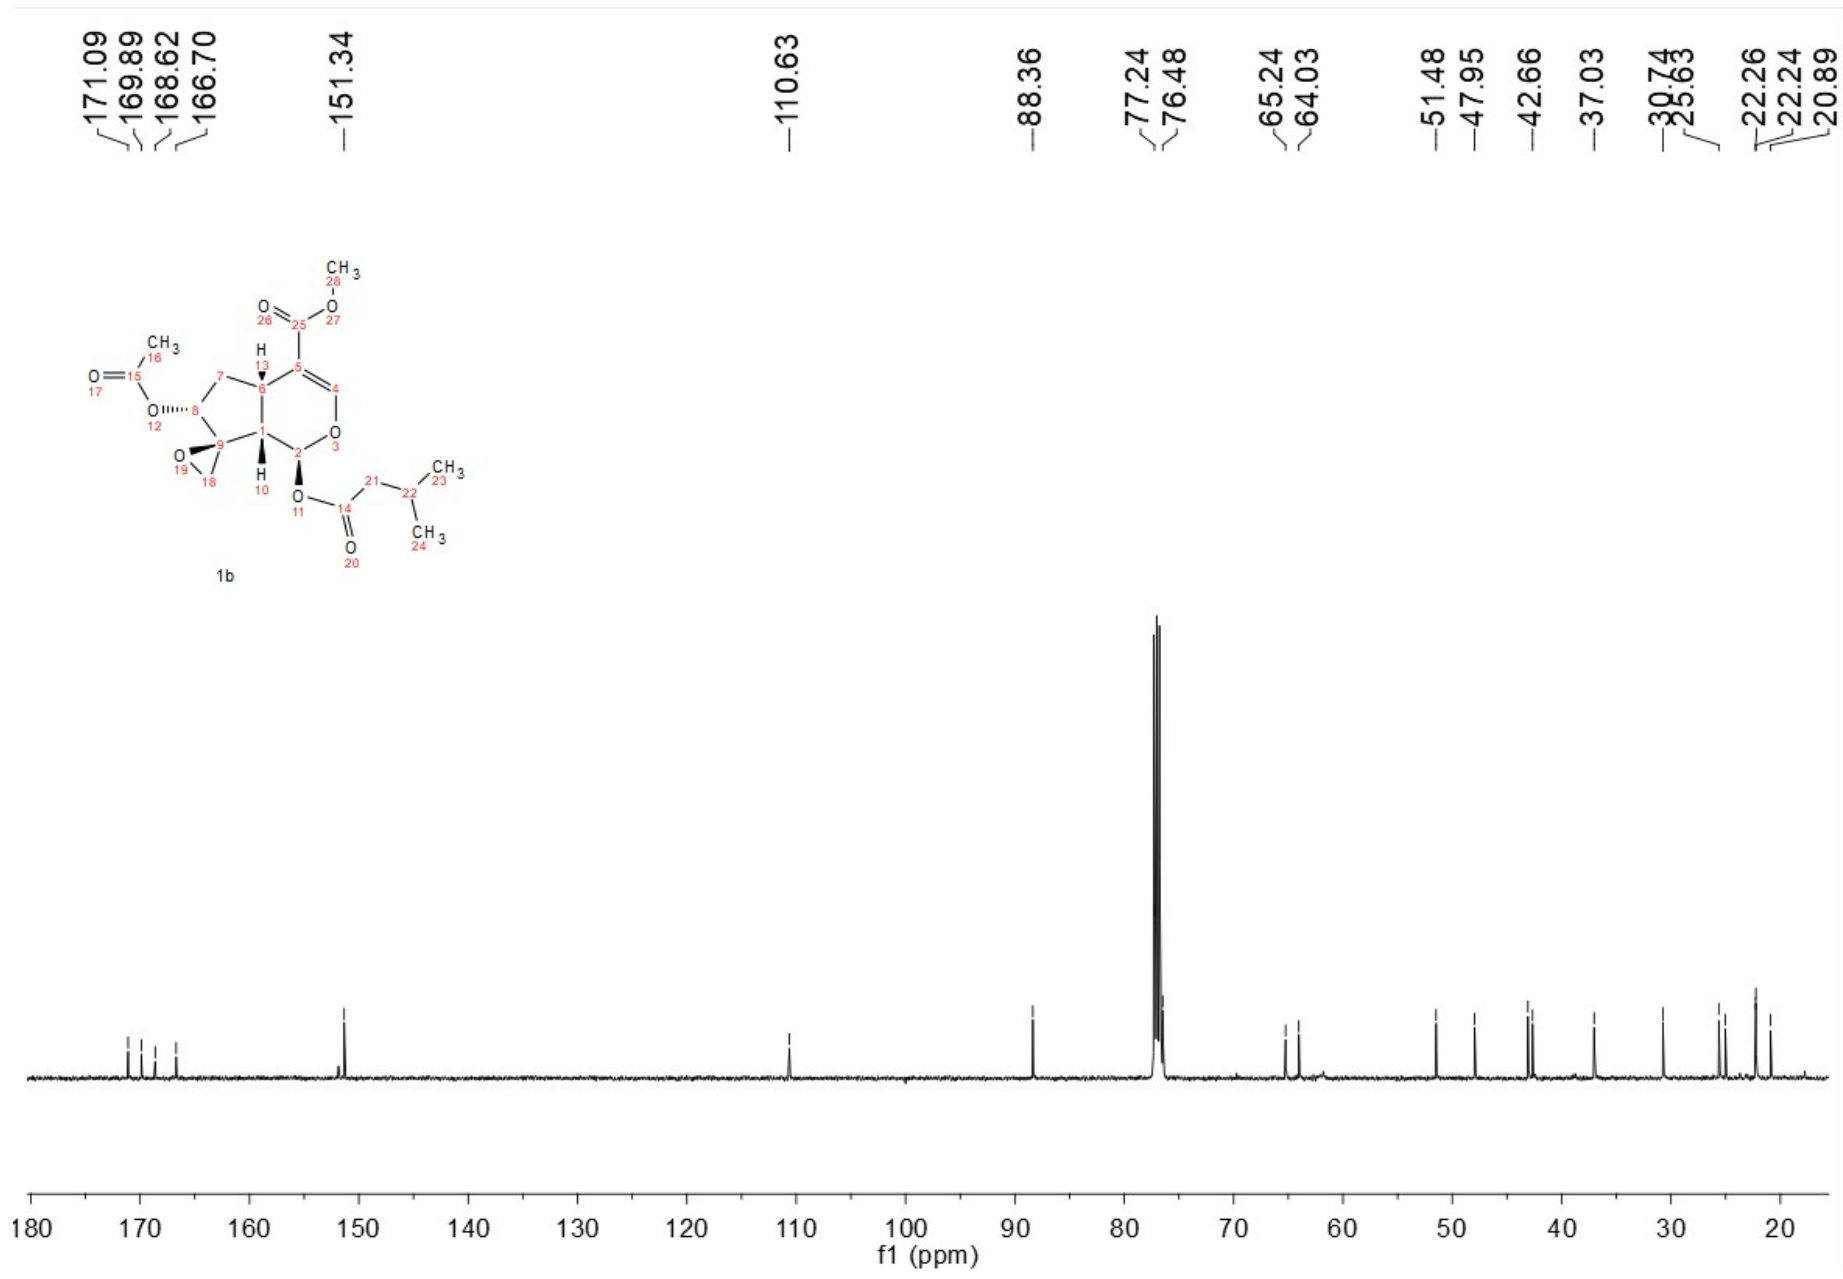

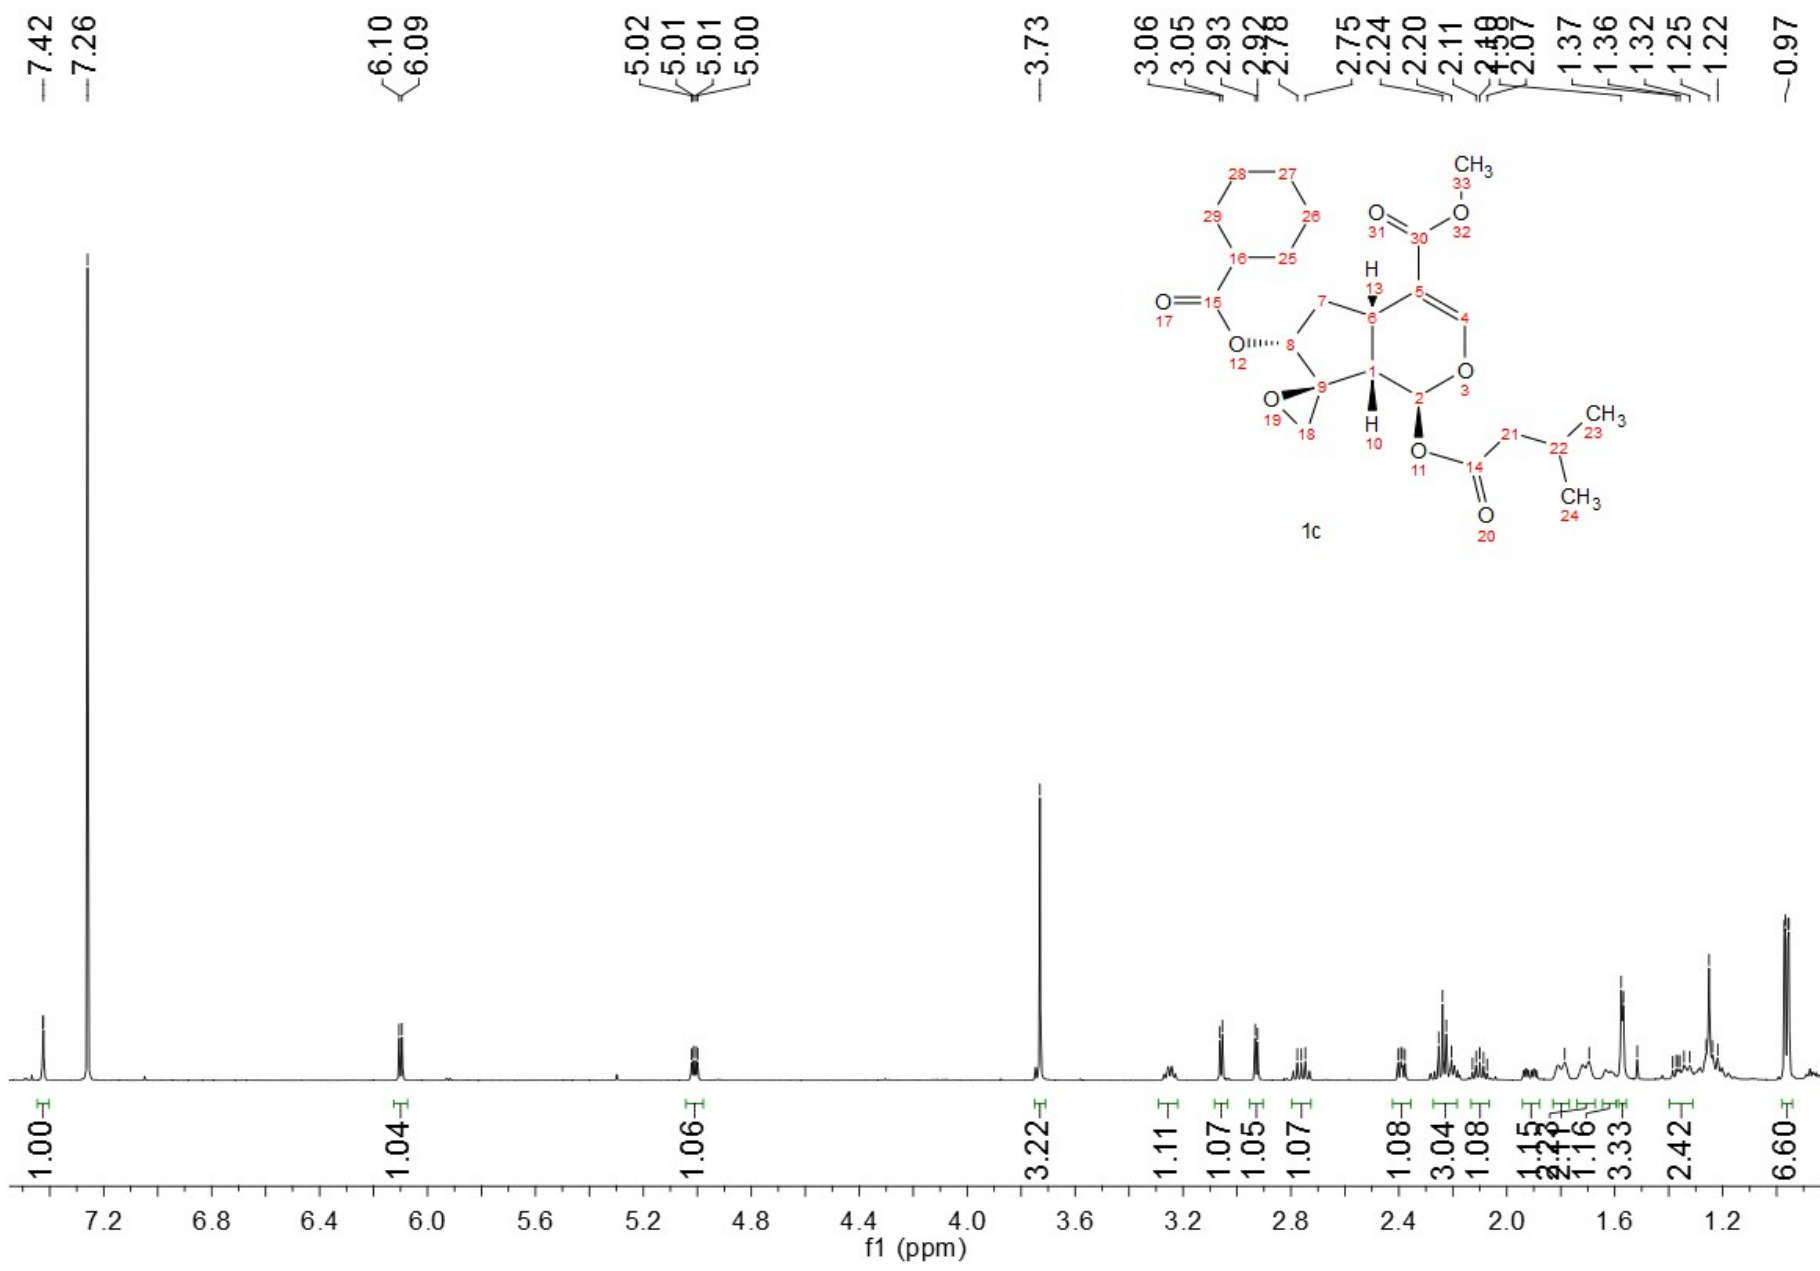

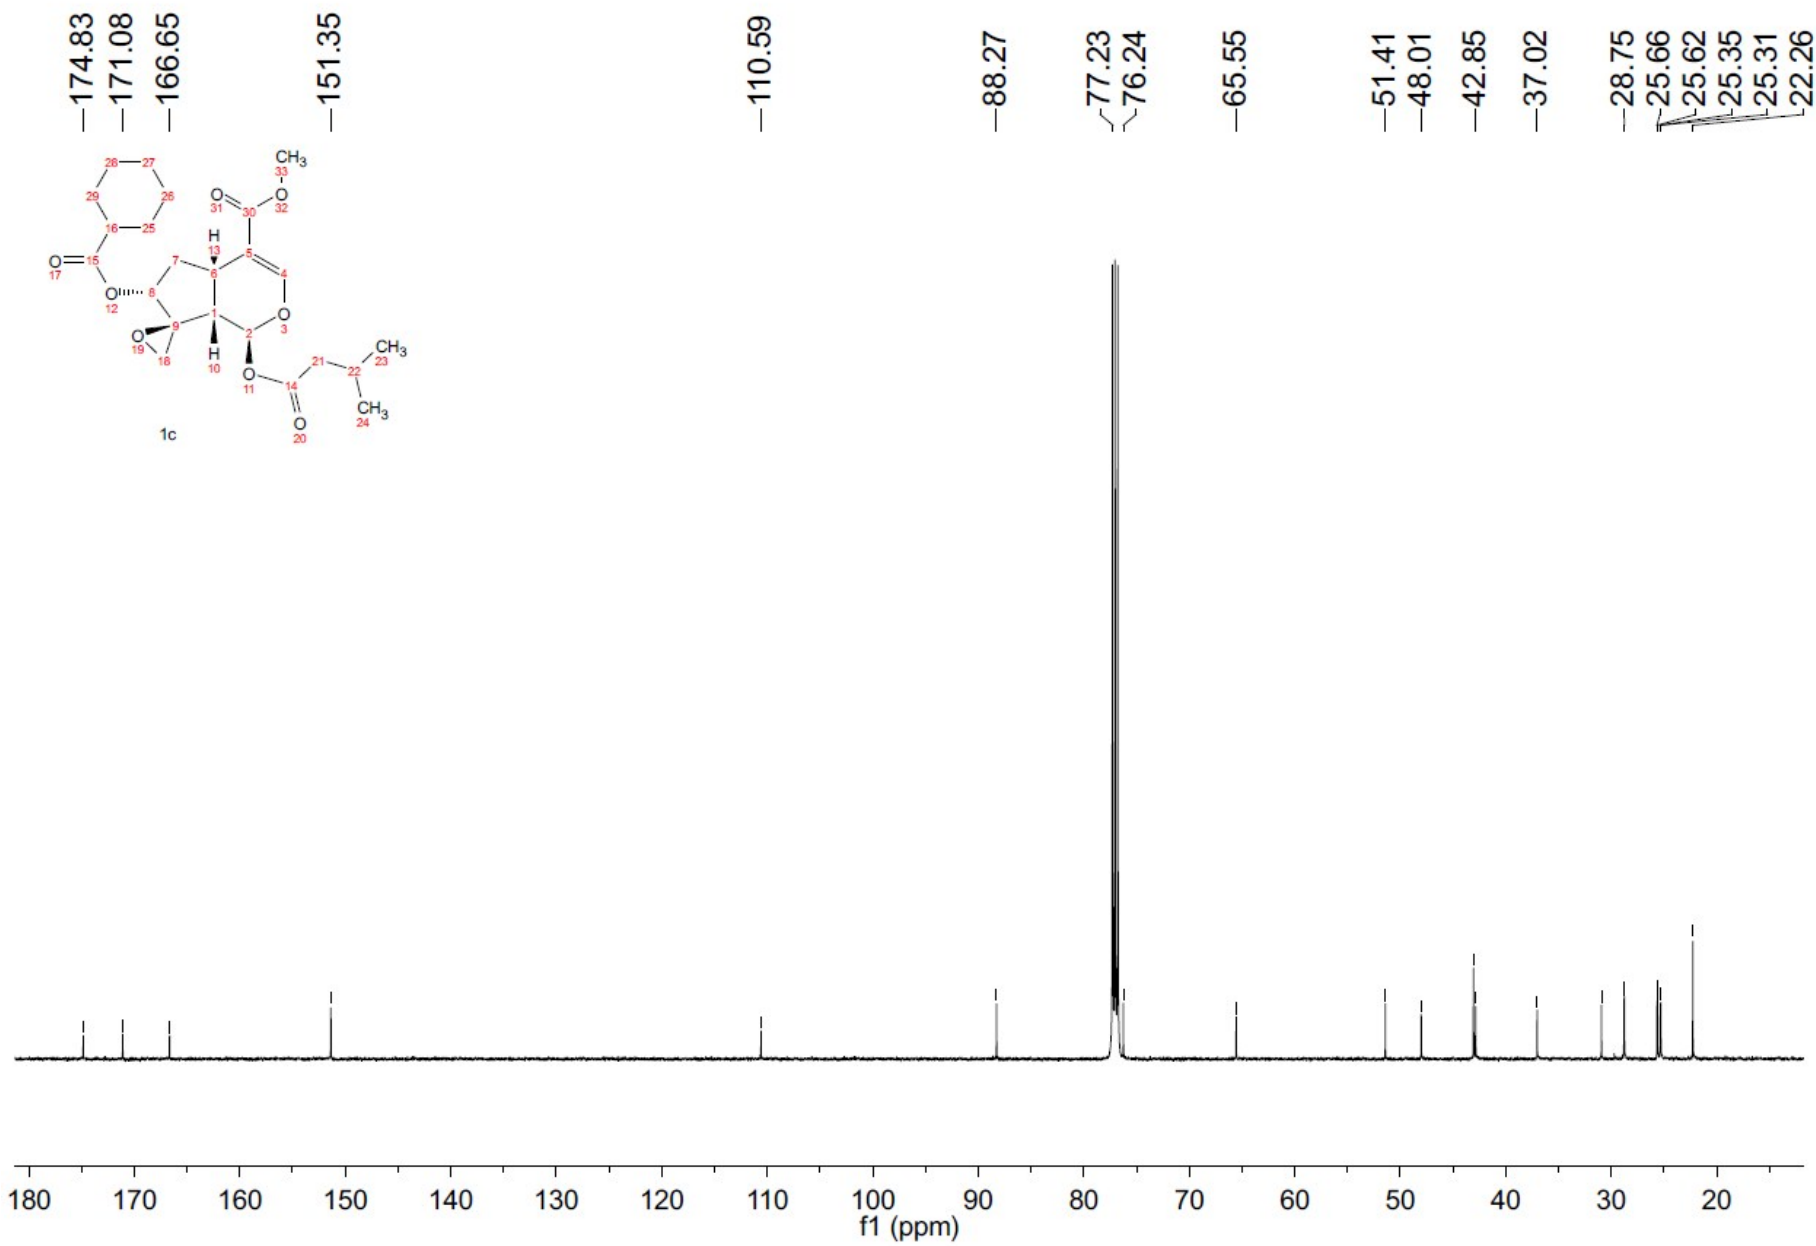

7.95  
7.93  
7.99  
7.44  
7.41  
7.26

6.20  
6.19

5.30

3.67

3.13  
3.12  
3.04  
3.03  
2.25  
2.15  
2.14  
2.12  
2.10  
2.08

1.57  
1.25  
1.21

0.96

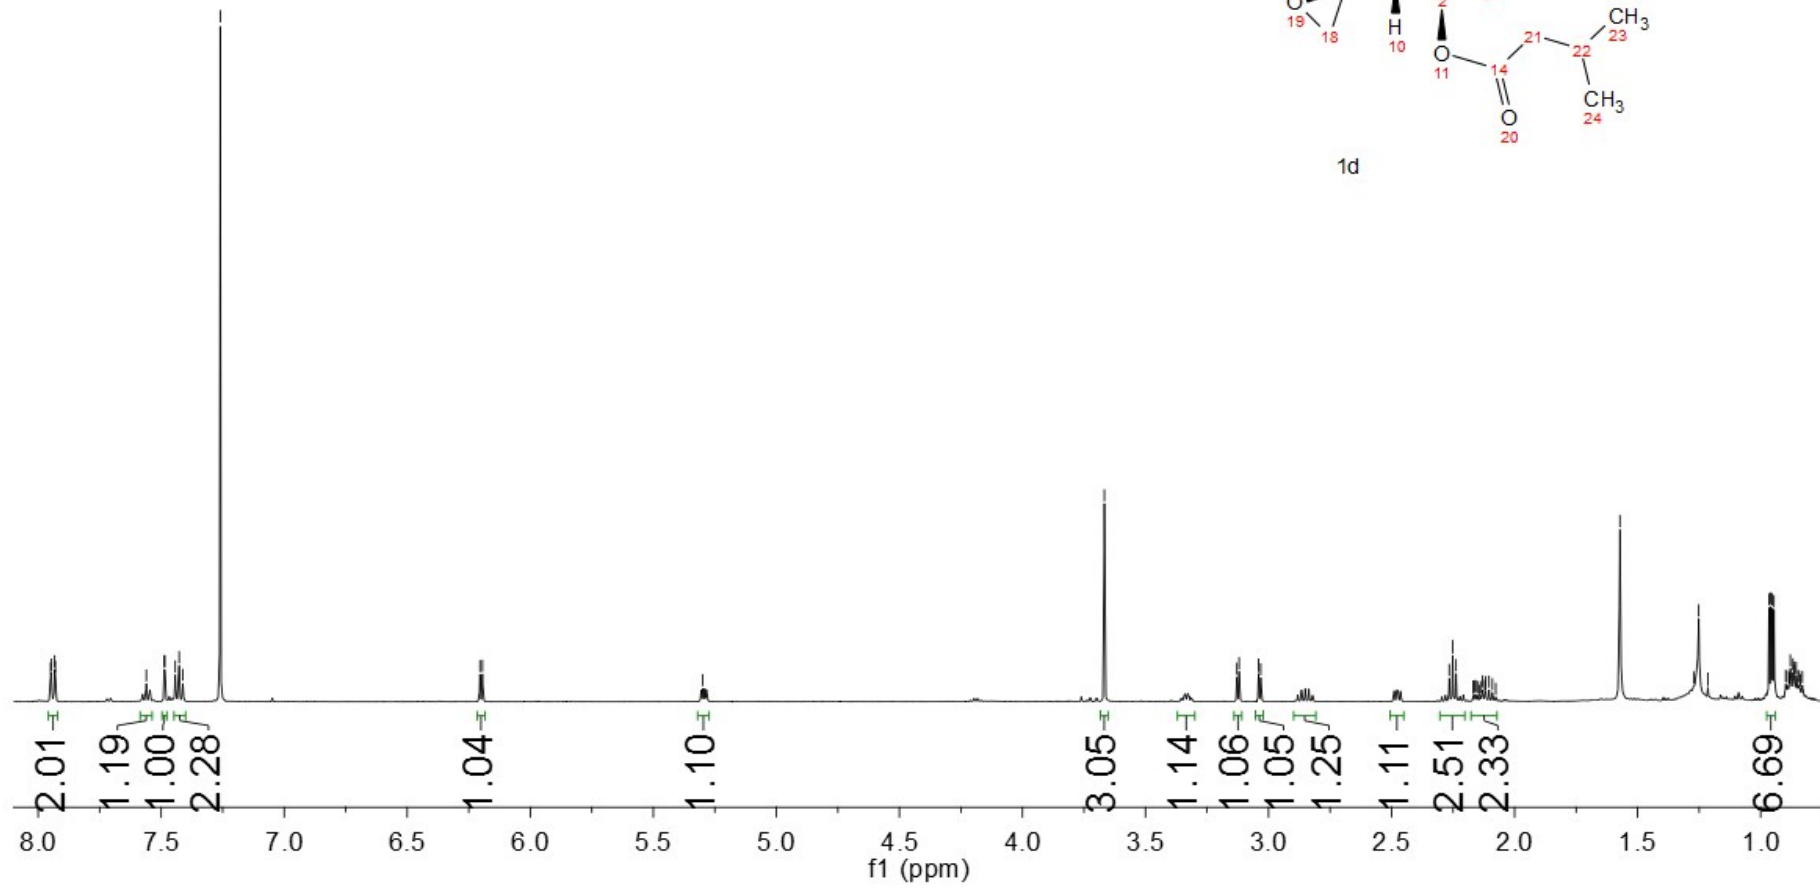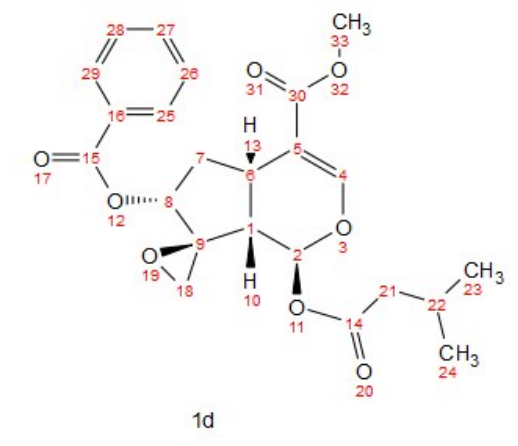



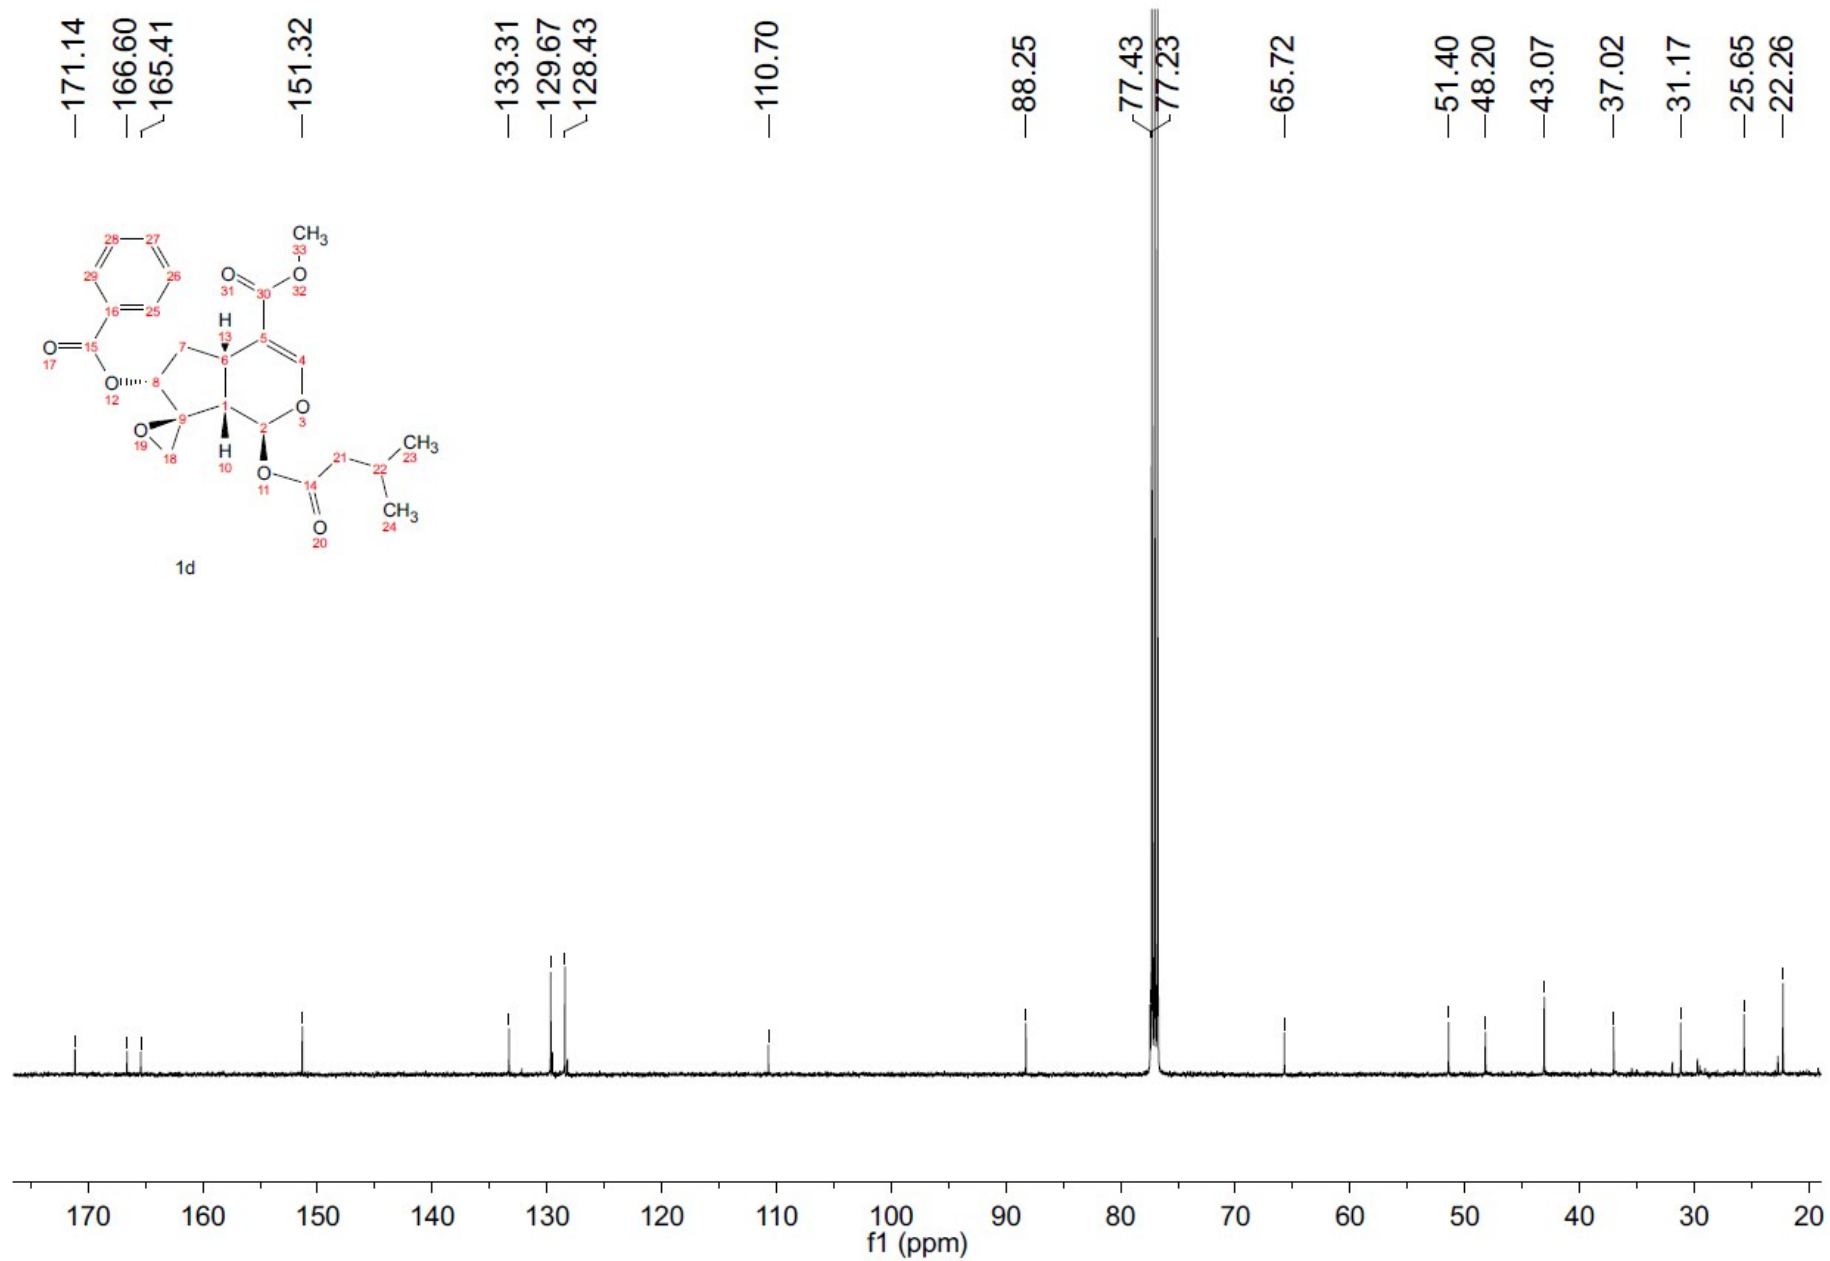

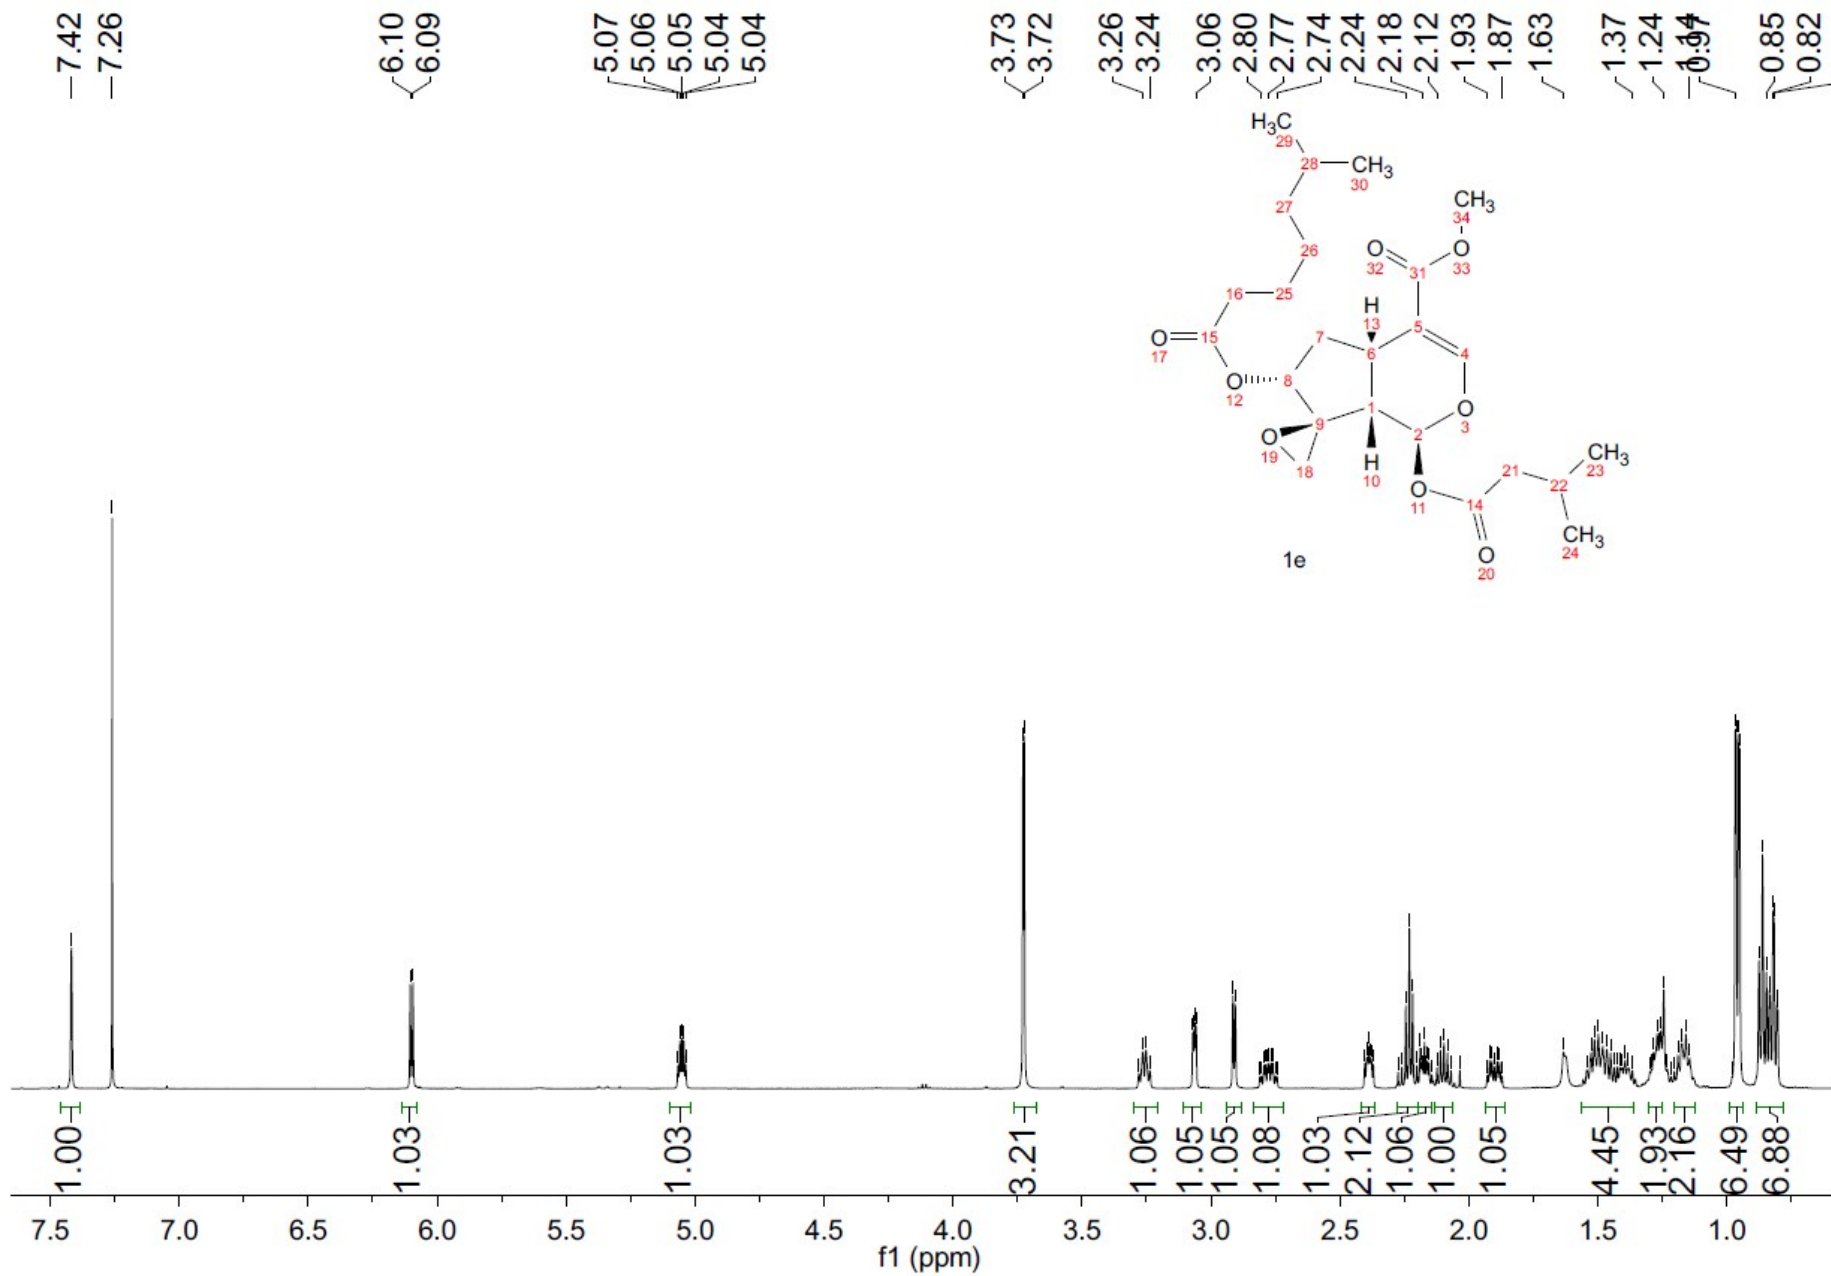

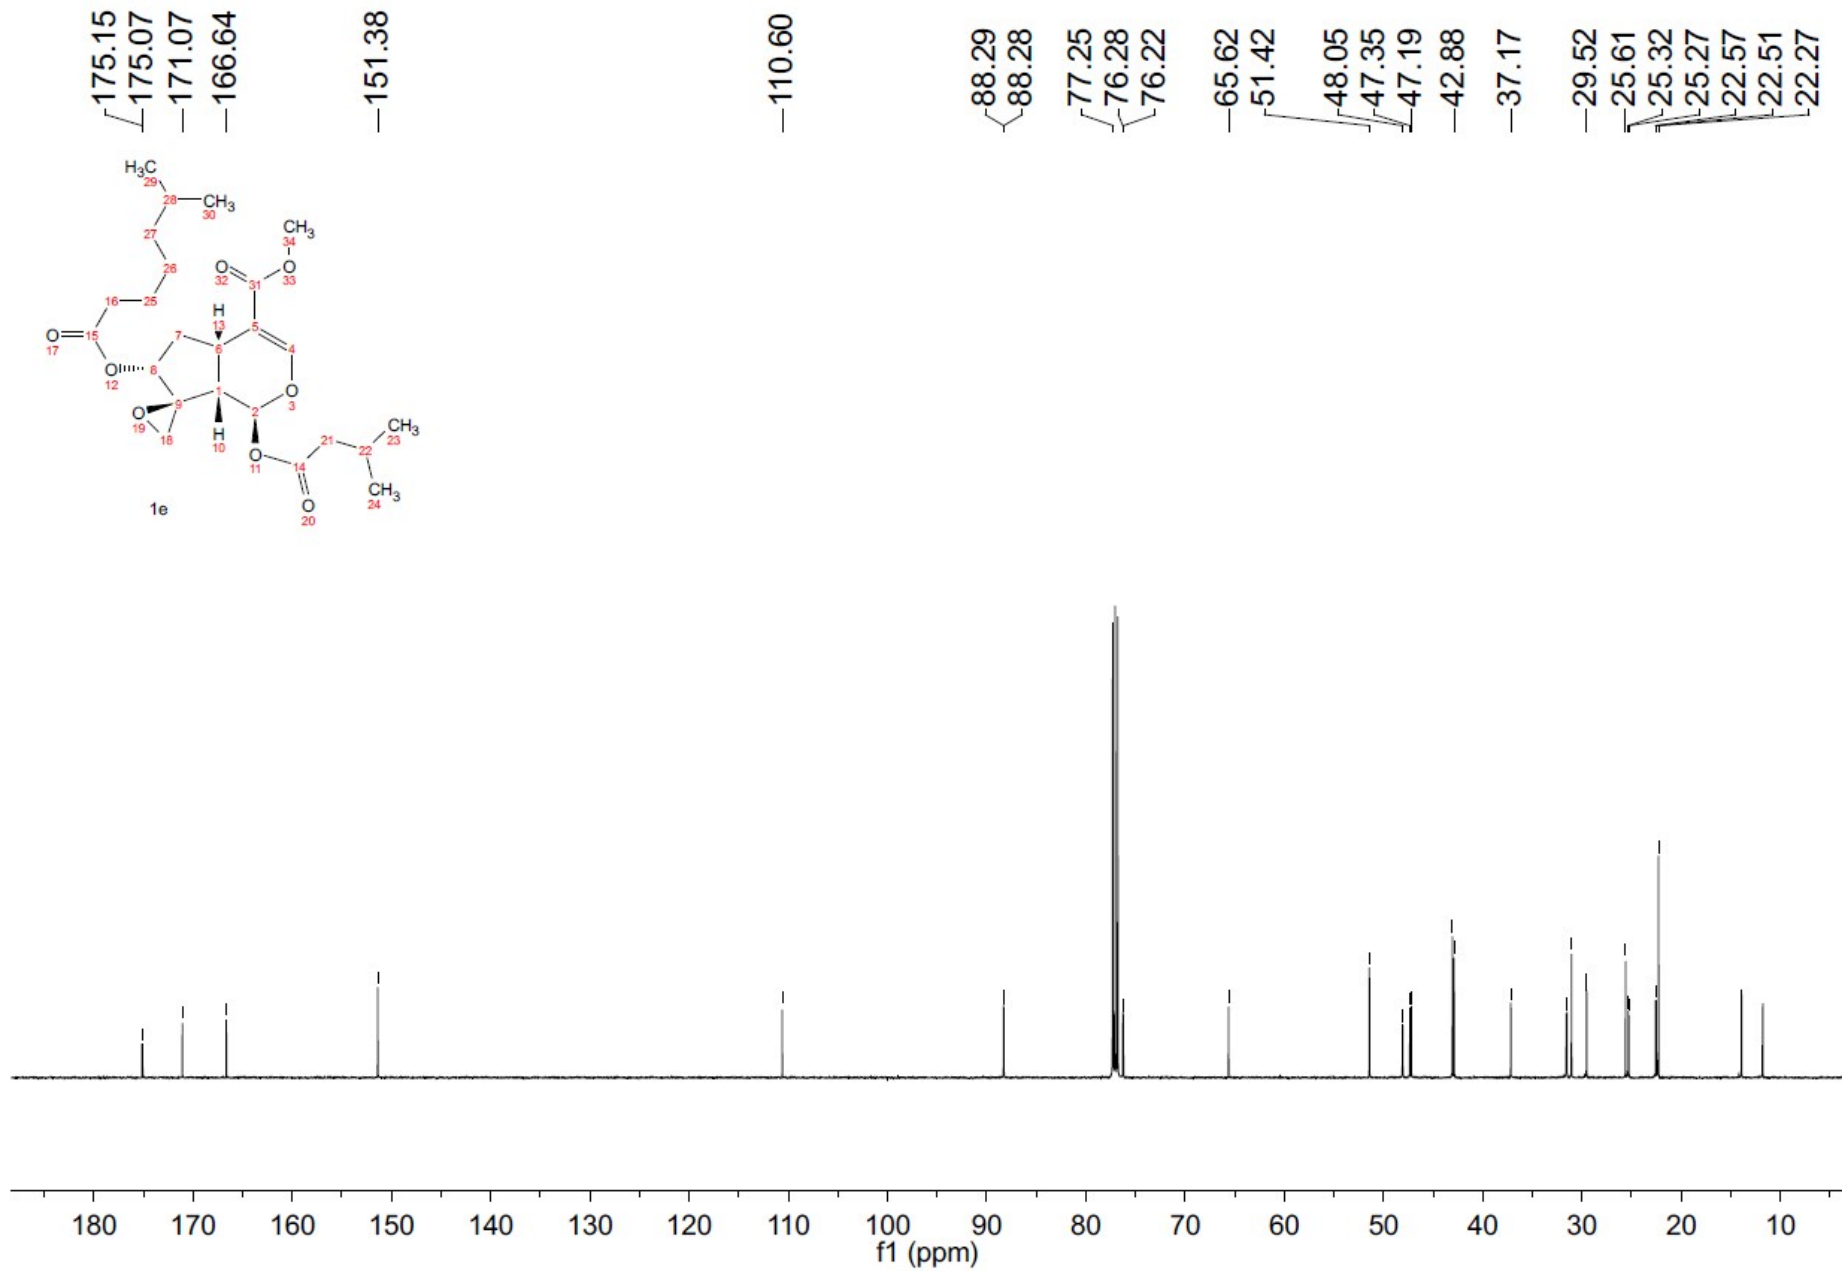

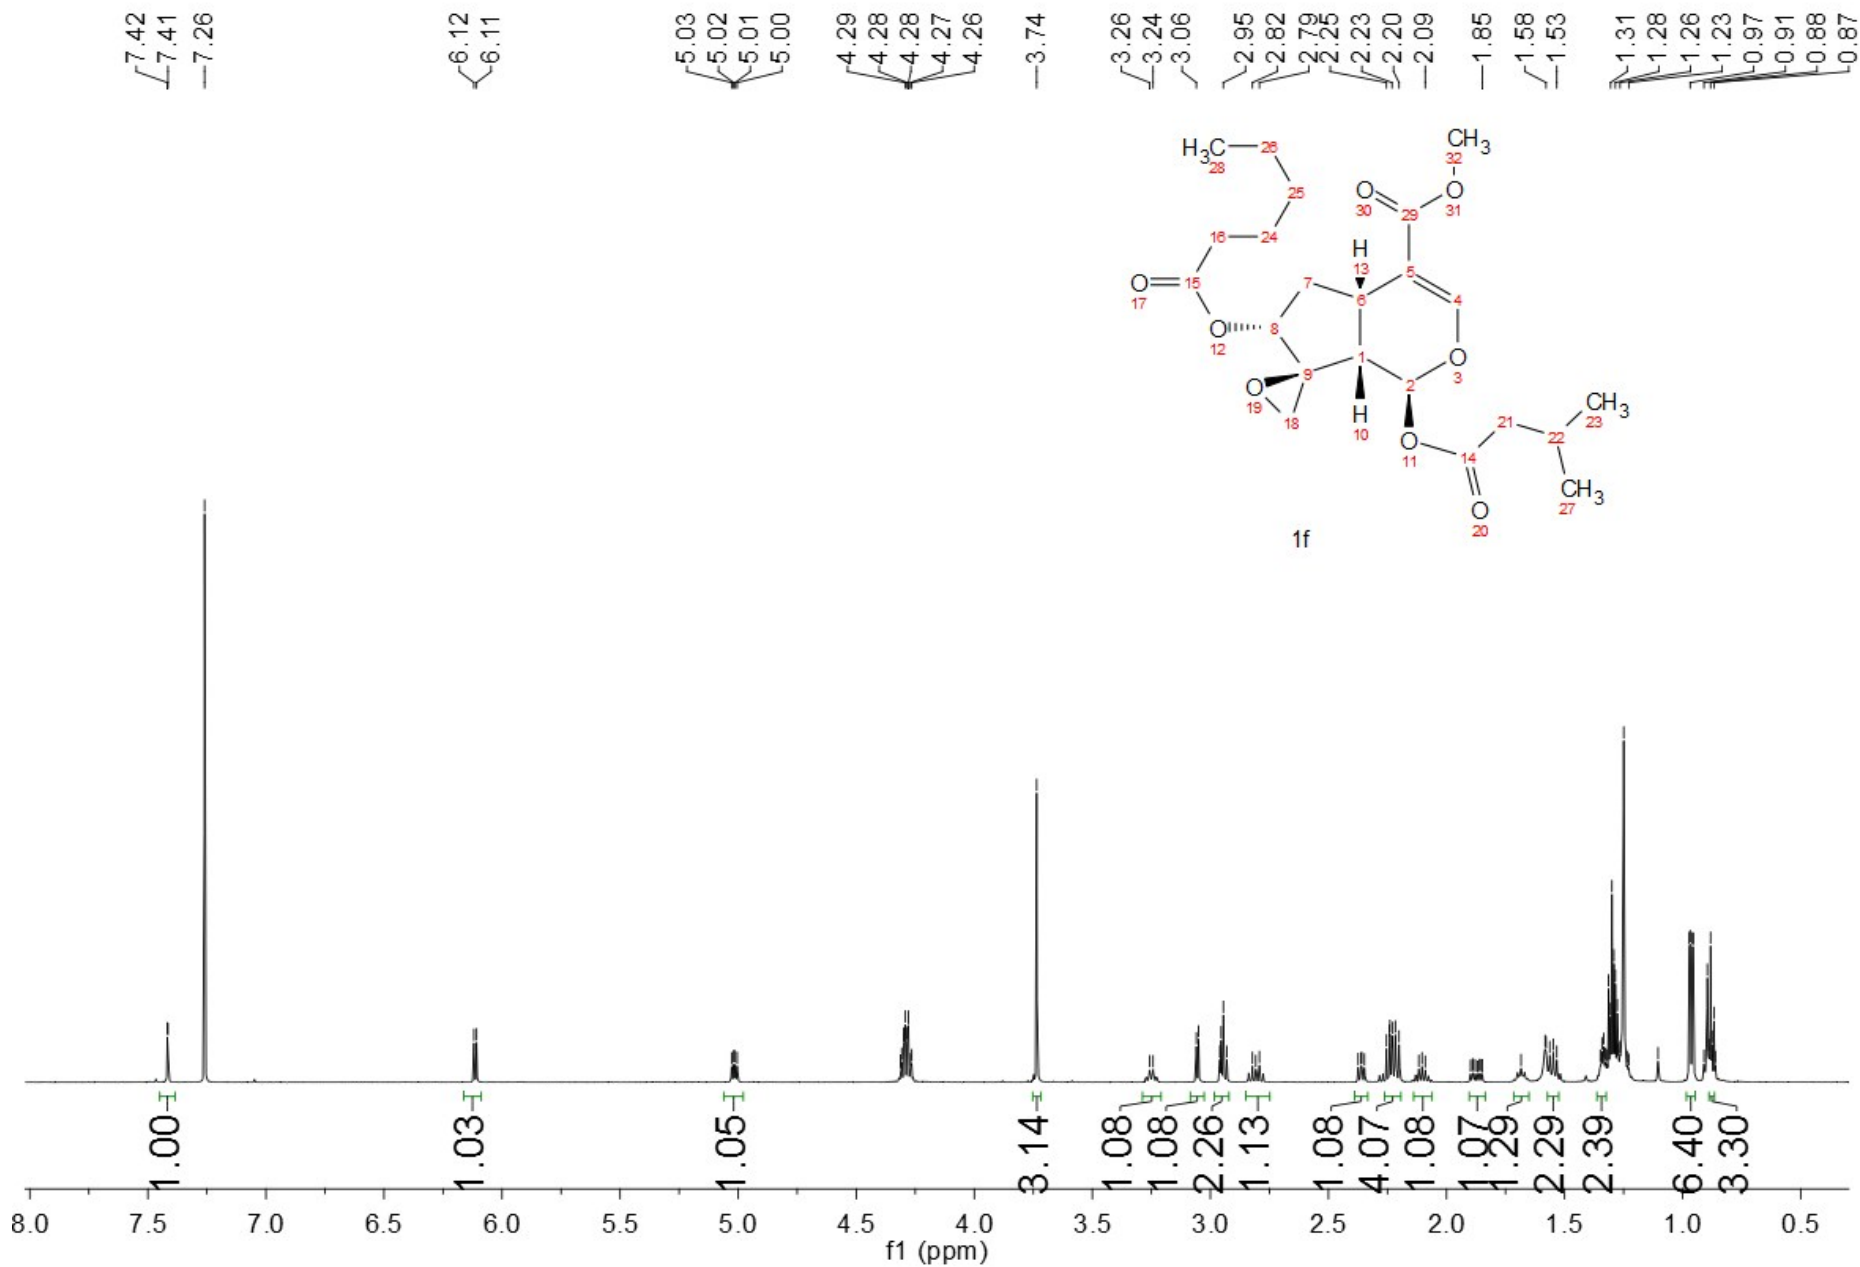

172.68  
171.99  
171.08  
166.69  
151.33

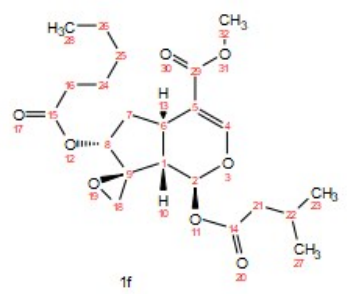

110.64

88.34

77.23  
76.30

65.39  
64.17  
63.97

51.46  
47.99  
42.74

34.21  
30.82

22.26  
14.15  
14.11  
13.93  
13.89

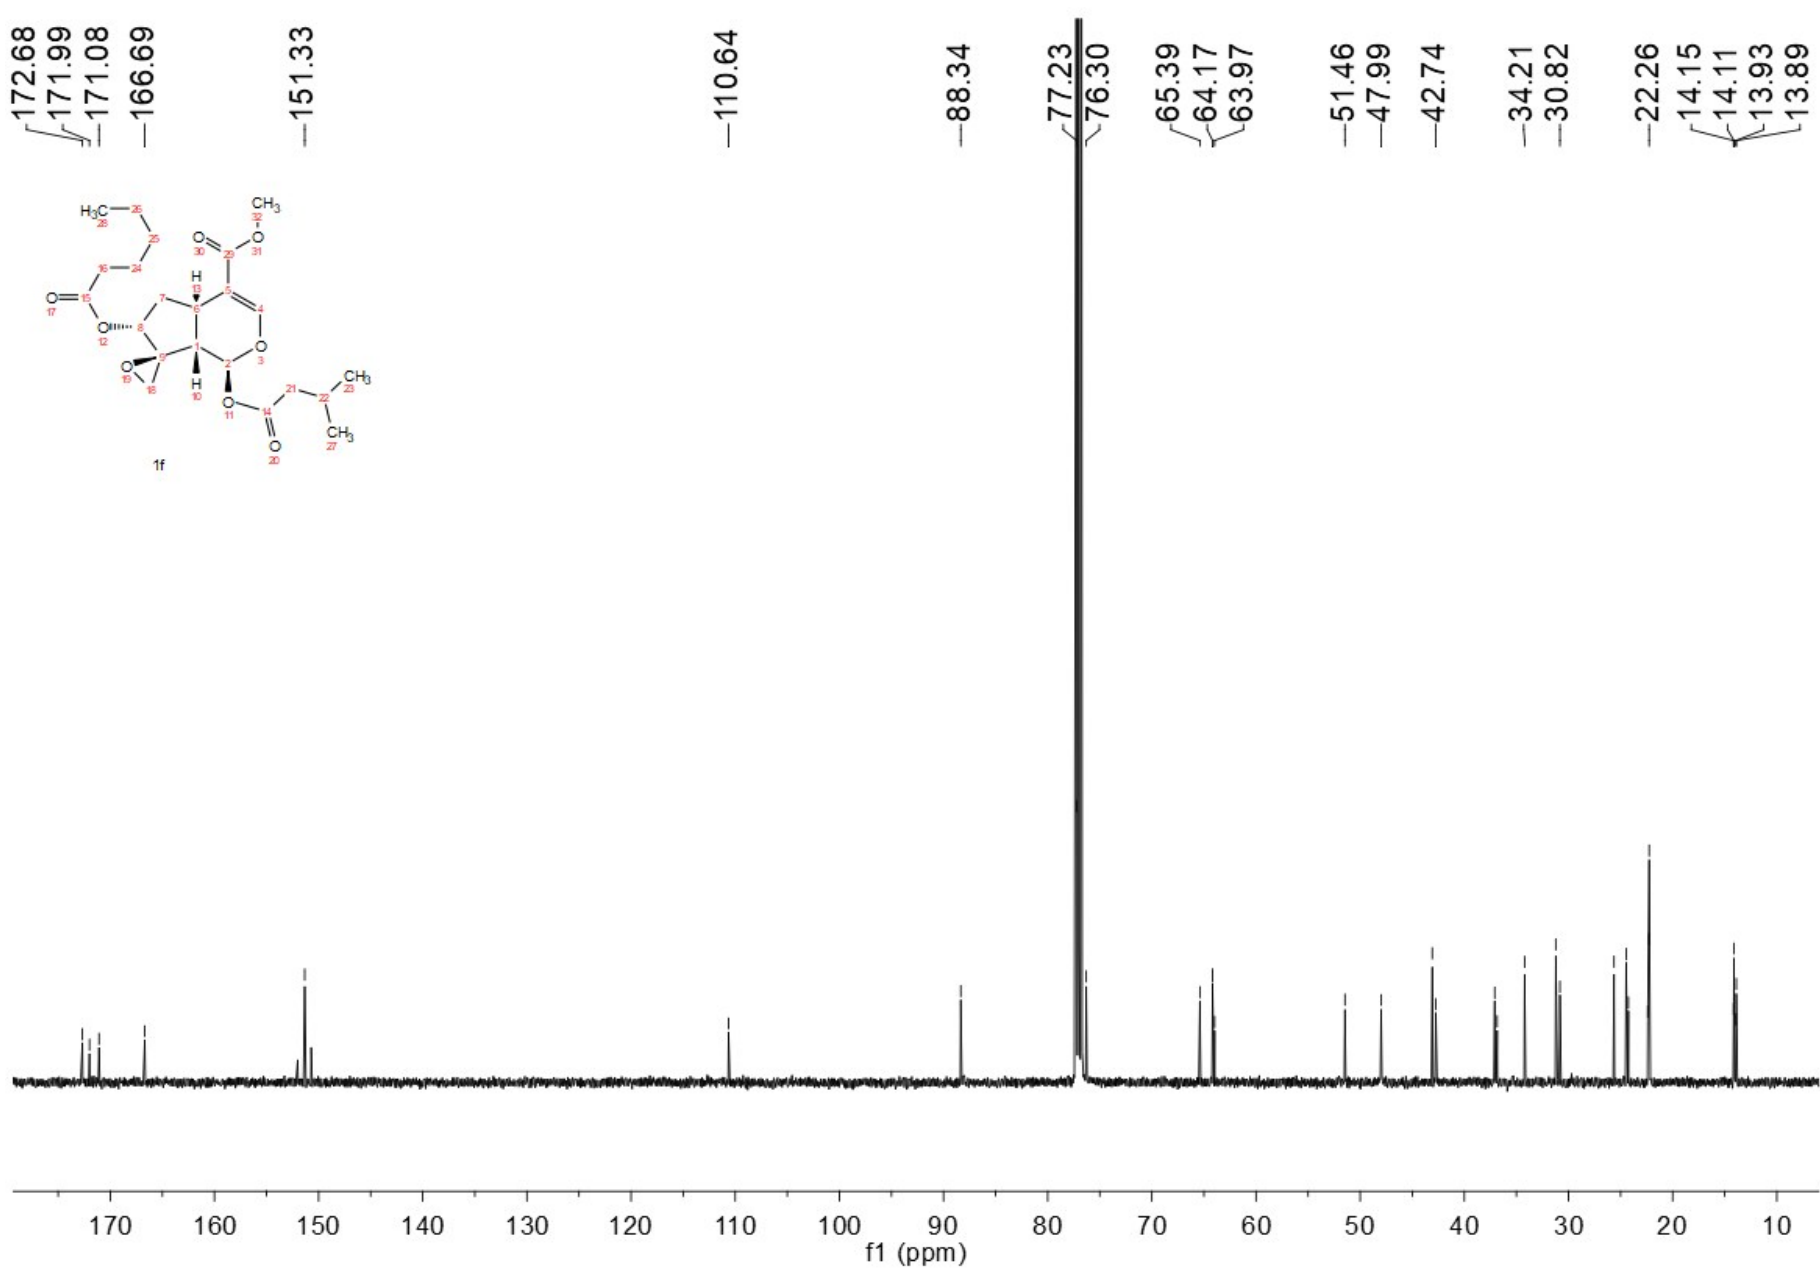

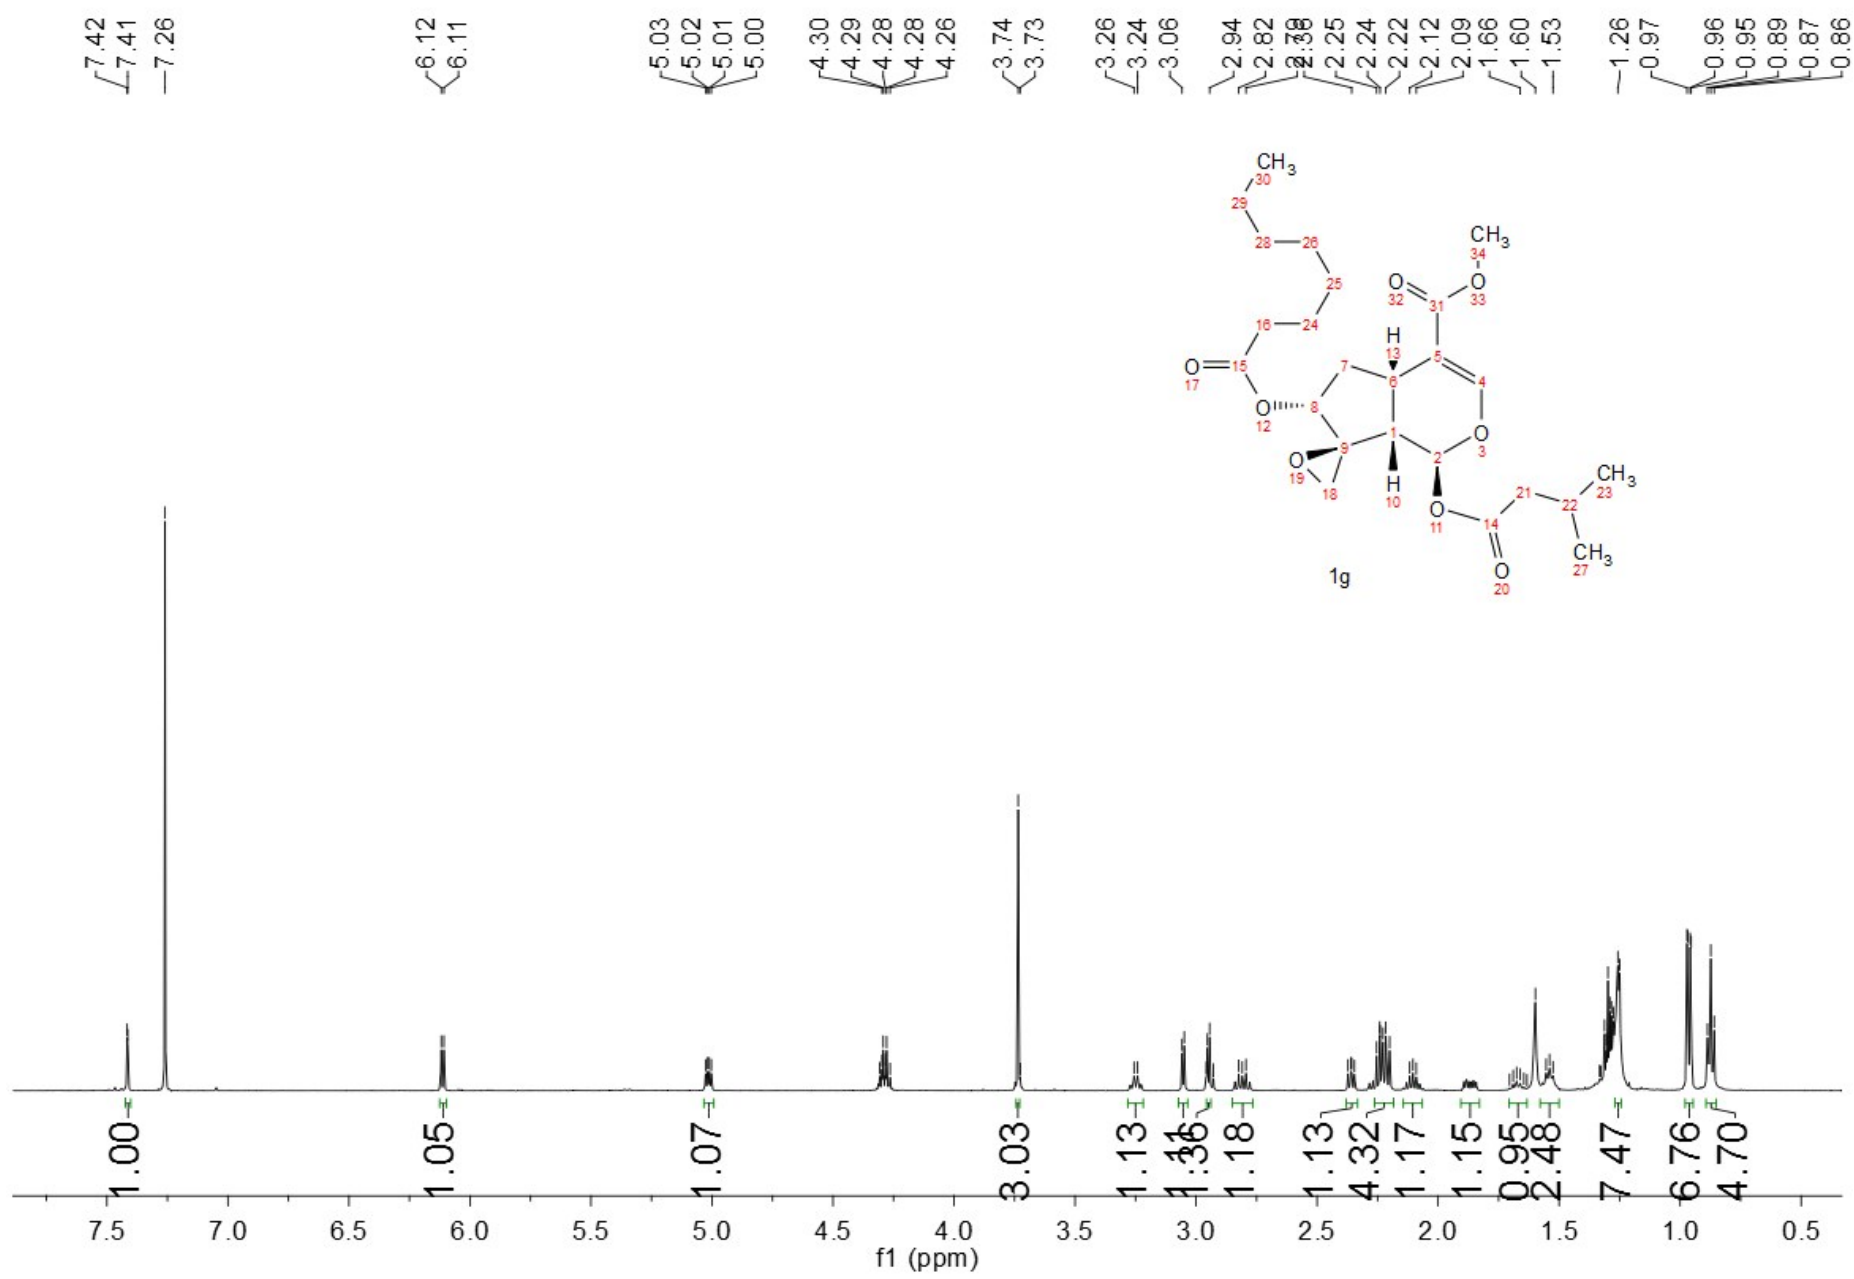

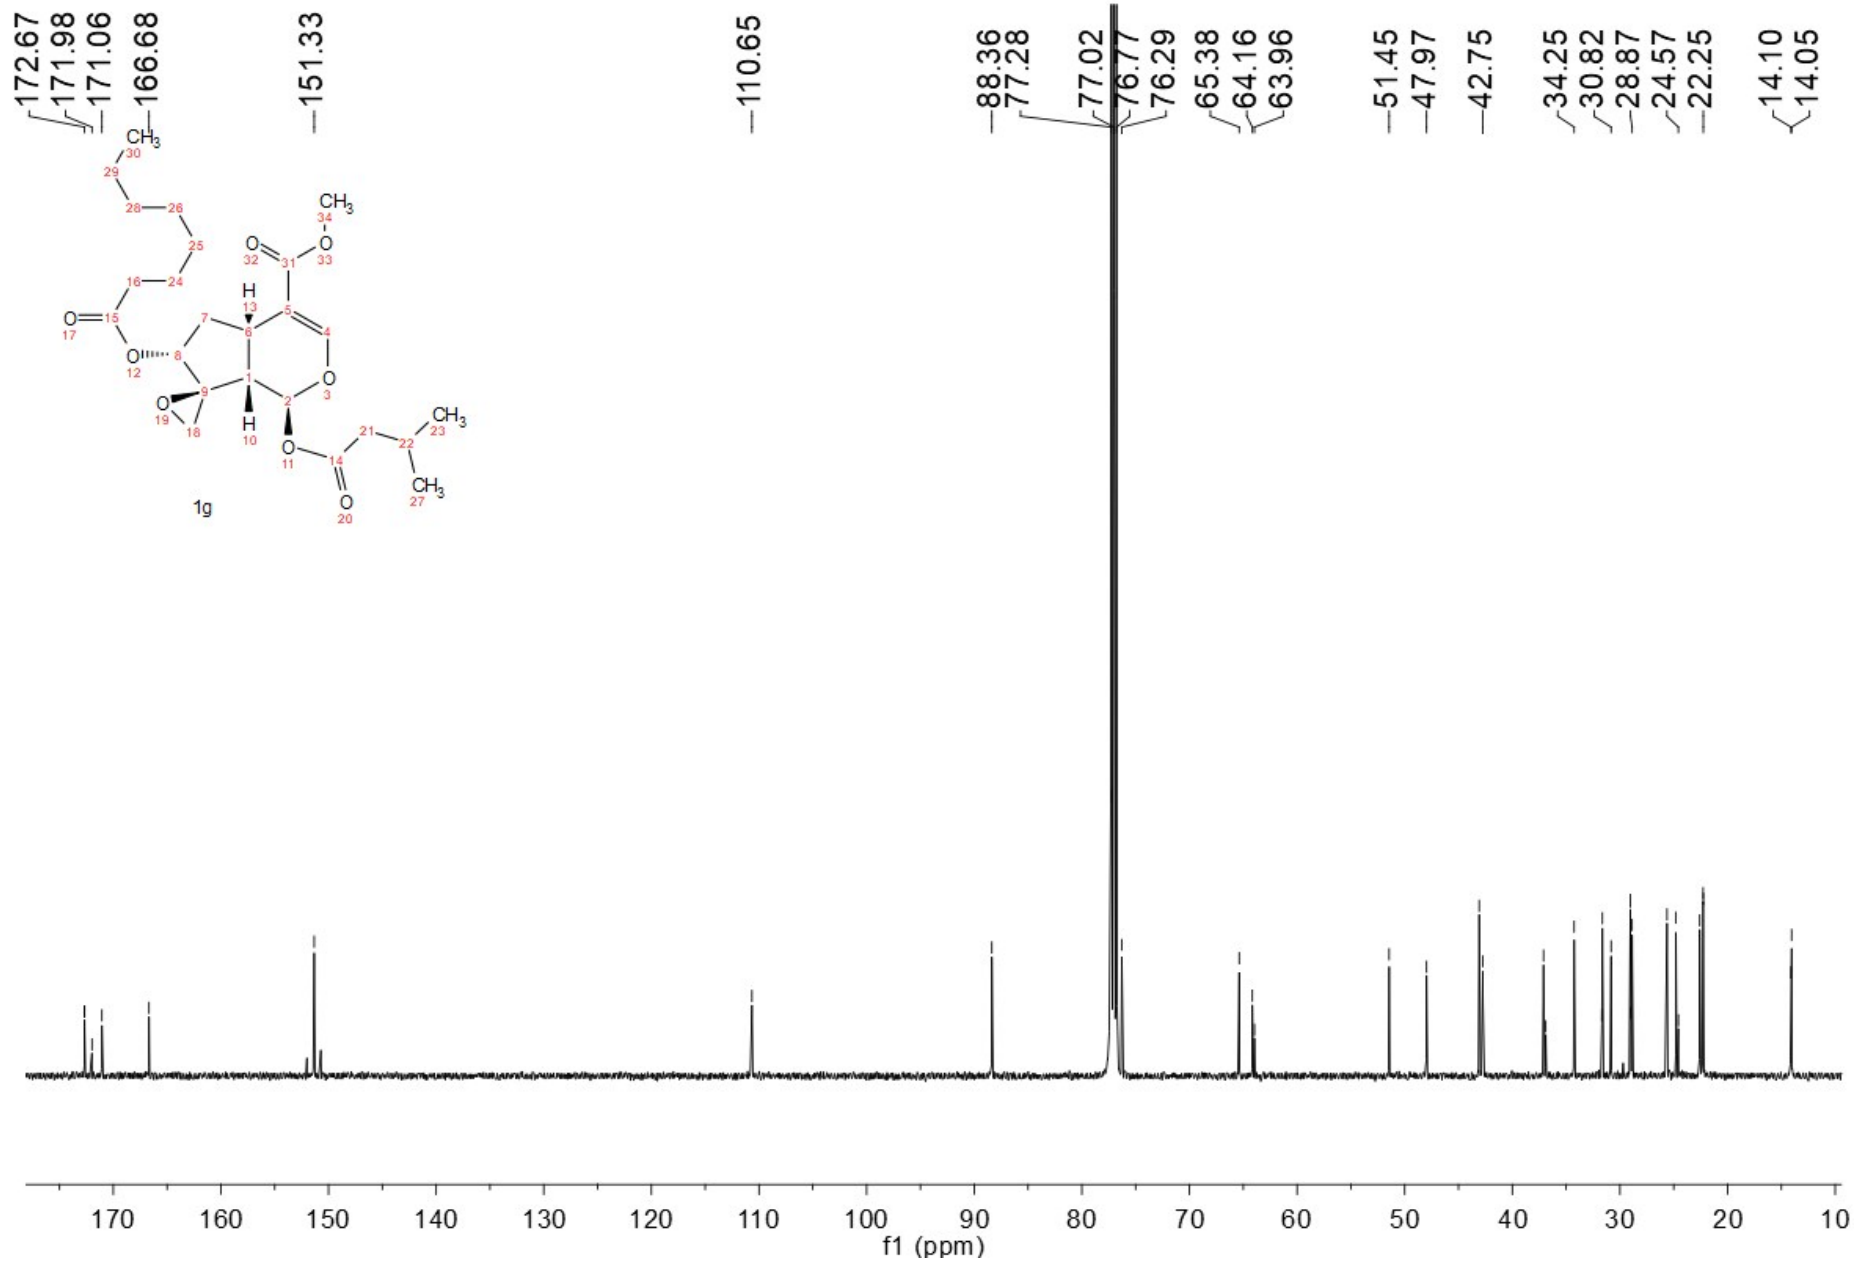

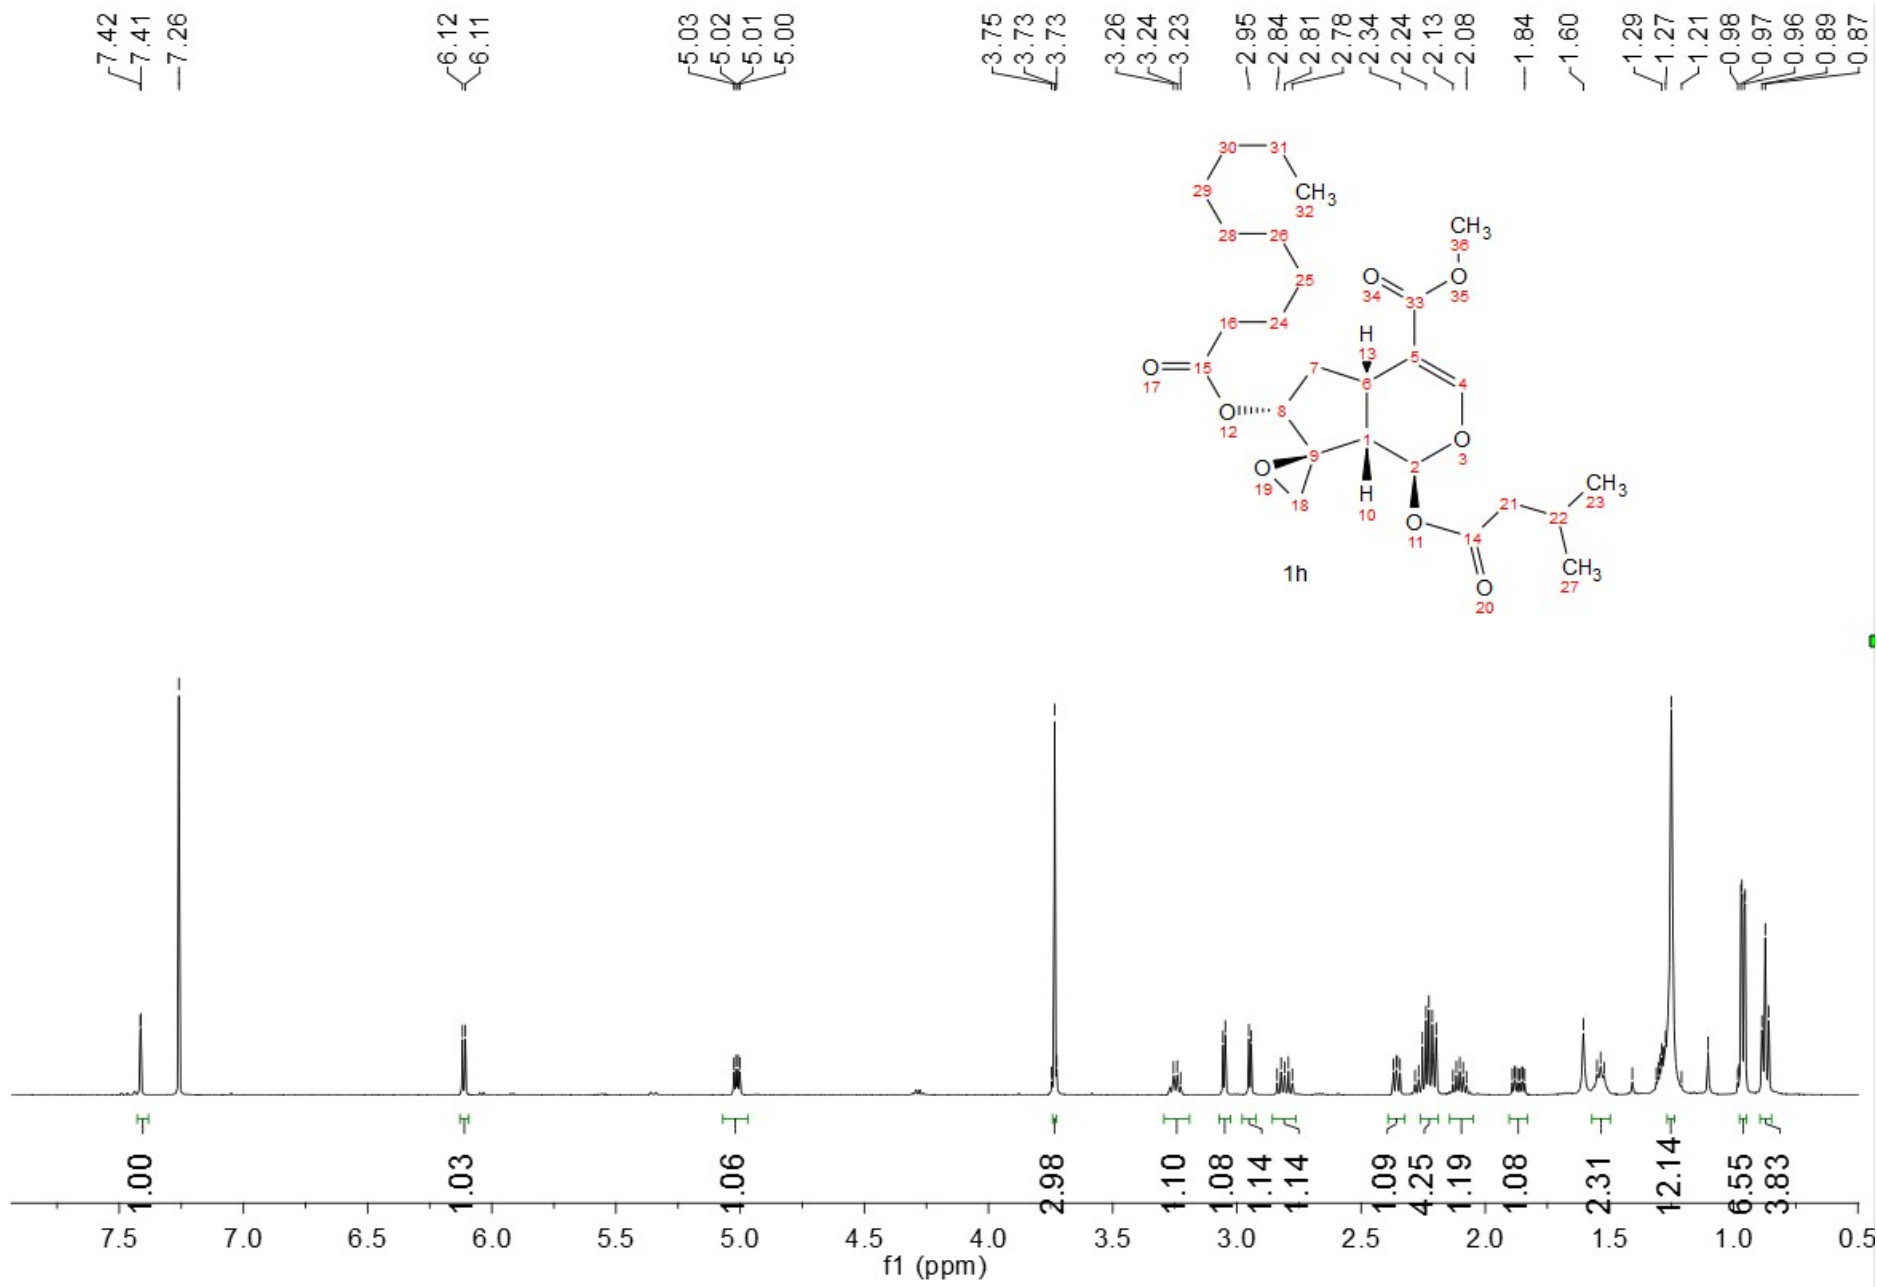



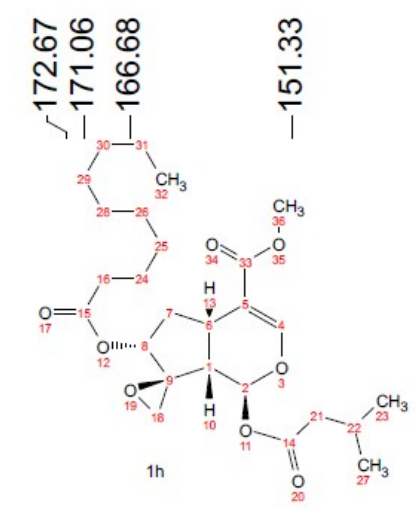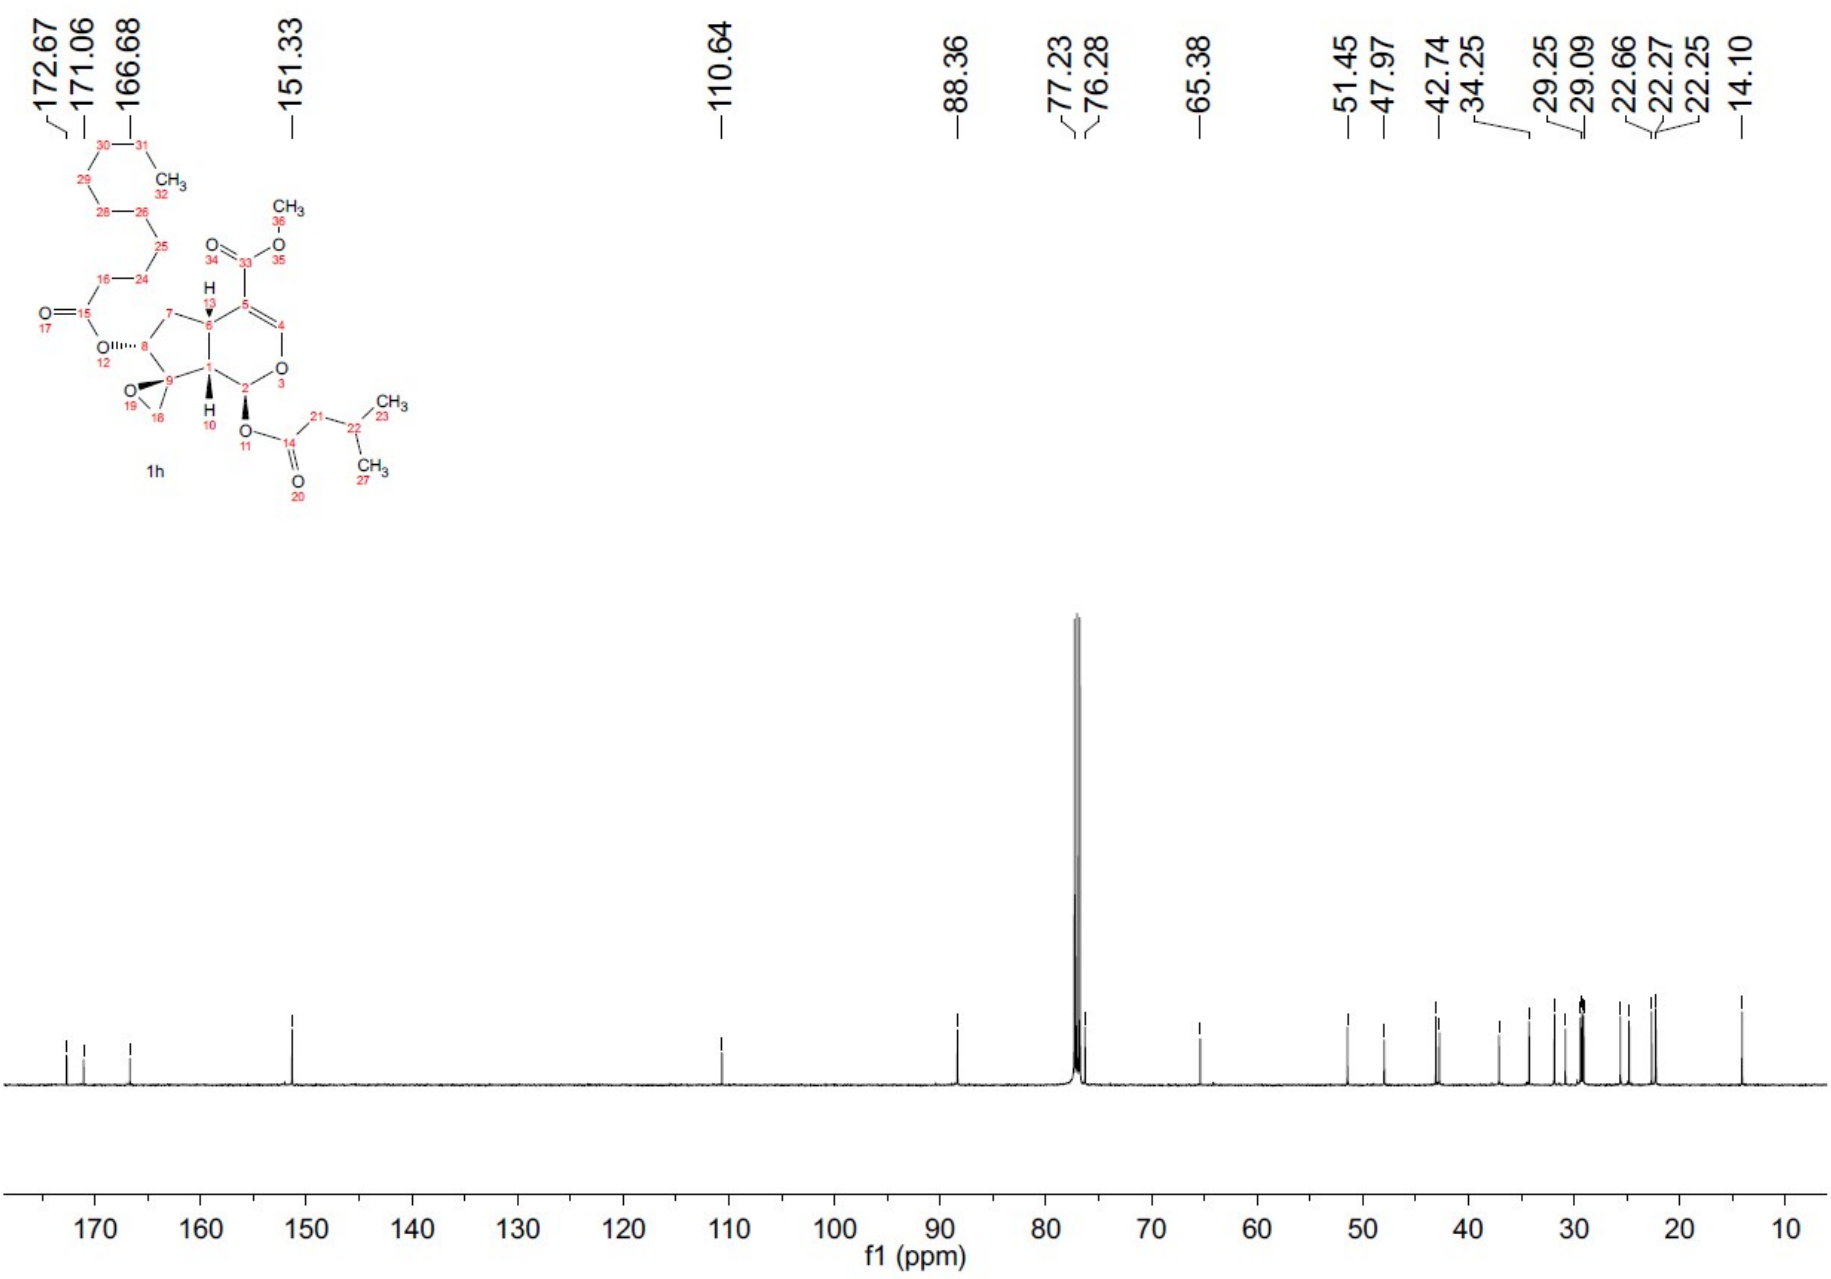

Supplement: c6ra27478a1.pdf [file c6ra27478a1.pdf]
